# Supplementary material for: Egg consumption and risk of cardiovascular disease: three large prospective US cohort studies, systematic review, and updated meta-analysis
Source: PubMed Central journal article supplement (PMC7190072; doi:10.1136/bmj.m513), 2020-03-04
Supplement: droj050974.ww.pdf [file droj050974.ww.pdf]

## Supplemental Material

|                                                                                                                                                                                                                                                                                                                                                     |    |
|-----------------------------------------------------------------------------------------------------------------------------------------------------------------------------------------------------------------------------------------------------------------------------------------------------------------------------------------------------|----|
| <b>Supplemental Table 1:</b> Systematic review search strategy.....                                                                                                                                                                                                                                                                                 | 2  |
| <b>Supplemental Table 2:</b> Age and age-standardized characteristics of participants in Nurses' Health Study, Nurses' Health Study II and Health Professionals Follow-Up Study in 1998/1999. ....                                                                                                                                                  | 3  |
| ‡Includes incident cases until the return of the 1998 questionnaire (1999 in NHS II).....                                                                                                                                                                                                                                                           | 5  |
| <b>Supplemental Table 3:</b> Multivariable adjusted hazard ratios (95% confidence intervals) for incident cardiovascular disease according to categories of whole egg consumption.....                                                                                                                                                              | 6  |
| <b>Supplemental Table 4:</b> Multivariable adjusted hazard ratios (95% confidence intervals) for incident coronary heart disease according to categories of whole egg consumption.....                                                                                                                                                              | 7  |
| <b>Supplemental Table 5:</b> Multivariable adjusted hazard ratios (95% confidence intervals) for incident stroke according to categories of whole egg consumption. ....                                                                                                                                                                             | 8  |
| <b>Supplemental Table 6:</b> Multivariable adjusted hazard ratios (95% confidence intervals) for incident cardiovascular disease according to categories of whole egg consumption: pooled results from the Nurses' Health Study, the Nurses' Health Study II, and the Health Professional's Follow-up Study using fixed-effects meta-analysis. .... | 9  |
| <b>Supplemental Table 7:</b> Hazard ratios (95% confidence intervals) of incident cardiovascular disease according to seven categories of egg consumption. ....                                                                                                                                                                                     | 10 |
| <b>Supplemental Table 8:</b> Multivariable adjusted hazard ratios (95% confidence intervals) for incident cardiovascular disease according to categories of whole egg consumption stratified by key variables. ....                                                                                                                                 | 11 |
| <b>Supplemental Table 9:</b> Hazard ratios (95% confidence intervals) of incident cardiovascular disease according to categories of total egg consumption, including eggs in mixed foods. ....                                                                                                                                                      | 13 |
| <b>Supplemental Table 10:</b> Characteristics of studies included in the meta-analysis. ....                                                                                                                                                                                                                                                        | 14 |
| <b>Supplemental Table 11:</b> List of confounders among studies included in the meta-analysis.....                                                                                                                                                                                                                                                  | 25 |
| <b>Supplemental Table 12:</b> Assessment of risk of bias with the Newcastle-Ottawa Scale.* .....                                                                                                                                                                                                                                                    | 28 |
| <b>Supplemental Figure 1:</b> Flow chart of participants.....                                                                                                                                                                                                                                                                                       | 29 |
| <b>Supplemental Figure 2:</b> Trends in mean egg consumption in the Nurses' Health Study, Nurses' Health Study II, and Health Professionals Follow-Up Study over time. ....                                                                                                                                                                         | 30 |
| <b>Supplemental Figure 3:</b> Statistical model-based hazard ratios and 95% confidence intervals for incident cardiovascular disease associated with replacement of one egg per day with one serving per day of other foods. ....                                                                                                                   | 31 |
| <b>Supplemental Figure 4:</b> Flow chart of study selection.....                                                                                                                                                                                                                                                                                    | 32 |
| <b>Supplemental Figure 5:</b> Funnel plot for assessment of publication bias for the association between egg consumption and risk of cardiovascular disease.....                                                                                                                                                                                    | 33 |
| <b>Supplemental Figure 6:</b> Forest plot of influence analysis for the association between egg consumption and risk of cardiovascular disease.....                                                                                                                                                                                                 | 34 |

**Supplemental Table 1:** Systematic review search strategy.

| Database       | Step | Terms                                                                                                                                                                                                                                                                                                                                                                                                                 | Results*   |
|----------------|------|-----------------------------------------------------------------------------------------------------------------------------------------------------------------------------------------------------------------------------------------------------------------------------------------------------------------------------------------------------------------------------------------------------------------------|------------|
| Pubmed         | 1    | “Egg” OR “Eggs”                                                                                                                                                                                                                                                                                                                                                                                                       | 126,331    |
|                | 2    | “Cardiovascular Diseases” [Mesh] OR “Stroke” [Mesh] OR Cardiovascular OR Coronary Heart Disease OR Myocardial Infarction OR CHD OR CVD OR Ischemic Heart Disease OR Ischaemic Heart Disease OR Ischaemic stroke OR Ischemic Stroke OR Haemorrhagic Stroke OR Hemorrhagic Stroke                                                                                                                                       | 3,213,209  |
|                | 3    | Prospective OR Cohort OR Longitudinal OR Follow-up OR Case-cohort OR Nested Case-control                                                                                                                                                                                                                                                                                                                              | 2,769,226  |
|                | 4    | human                                                                                                                                                                                                                                                                                                                                                                                                                 | 18,572,110 |
|                | 5    | #1 AND #2 AND #3 AND #4                                                                                                                                                                                                                                                                                                                                                                                               | <b>216</b> |
| Web of Science | 1    | (TS=(((Egg) AND (Cardiovascular or Stroke or Coronary Heart Disease or Myocardial Infarction or CHD or CVD or Ischemic Heart Disease or Ischaemic Heart Disease)) AND (Prospective or Cohort or Longitudinal or Follow-up or Case-cohort or Nested Case-control))) AND DOCUMENT TYPES: (Article)                                                                                                                      | <b>370</b> |
| Embase         | 1    | ('egg'/exp OR egg OR 'eggs'/exp OR eggs OR egg.ab.) AND [embase]/lim                                                                                                                                                                                                                                                                                                                                                  | 93,138     |
|                | 2    | ('cardiovascular disease'/exp OR cardiovascular.ab. OR 'ischemic heart disease.ab.' OR 'coronary artery disease.ab.' OR 'cerebrovascular accident' OR 'stroke.ab.' OR 'chd.ab.' OR 'cvd.ab.' OR 'coronary heart disease.ab.' OR 'myocardil infarction' OR 'ischaemic heart disease.ab.' OR 'ischaemic stroke.ab.' OR 'ischemic stroke.ab.' OR 'haemorrhagic stroke.ab.' OR 'hemorrhagic stroke.ab.') AND [embase]/lim | 3,468,794  |
|                | 3    | ('prospective study' OR 'cohort study' OR 'case control study' OR 'longitudinal study' OR 'follow up' OR 'case-cohort' OR 'case-control') AND [embase]/lim                                                                                                                                                                                                                                                            | 2,281,202  |
|                | 4    | 'human' AND [embase]/lim                                                                                                                                                                                                                                                                                                                                                                                              | 15,638,594 |
|                | 5    | (#1 AND #2 AND #3 AND #4)                                                                                                                                                                                                                                                                                                                                                                                             | <b>375</b> |

\* Search date: 2019-08-06.

**Supplemental Table 2:** Age and age-standardized characteristics of participants in Nurses' Health Study, Nurses' Health Study II and Health Professionals Follow-Up Study in 1998/1999.

|                                            | Frequency of egg consumption |               |              |              |              |             |
|--------------------------------------------|------------------------------|---------------|--------------|--------------|--------------|-------------|
|                                            | <1/month                     | 1 to <4/month | 1 to <3/week | 3 to <5/week | 5 to <7/week | ≥1/day      |
| <b>Nurses' Health Study (1998)</b>         |                              |               |              |              |              |             |
| Participants, n                            | 2,700                        | 15,811        | 41,313       | 13,350       | 1,901        | 1,080       |
| Age, years                                 | 64.9 (7.1)                   | 64.0 (7.2)    | 63.6 (7.1)   | 63.4 (7.1)   | 63.1 (7.0)   | 63.5 (6.9)  |
| Body mass index, kg/m <sup>2</sup>         | 25.5 (5.0)                   | 25.8 (4.9)    | 26.7 (5.2)   | 27.6 (5.7)   | 27.7 (6.3)   | 28.1 (6.3)  |
| Physical activity, MET-hours/week          | 19.9 (30.3)                  | 17.5 (21.7)   | 17.0 (20.6)  | 16.5 (21.2)  | 16.4 (21.7)  | 18.1 (27.2) |
| White race, %                              | 97                           | 97            | 98           | 97           | 97           | 97          |
| Smoking Status                             |                              |               |              |              |              |             |
| Never smoker, %                            | 41                           | 44            | 46           | 49           | 49           | 49          |
| Past smoker, %                             | 45                           | 45            | 44           | 40           | 38           | 39          |
| Current smoker, %                          | 14                           | 11            | 10           | 11           | 12           | 12          |
| Postmenopausal, %                          | 96                           | 96            | 96           | 95           | 95           | 93          |
| Current menopausal hormone use, %          | 40                           | 44            | 46           | 41           | 39           | 35          |
| Family history of diabetes, %              | 27                           | 28            | 28           | 27           | 27           | 24          |
| Family history of myocardial infarction, % | 19                           | 20            | 19           | 17           | 18           | 18          |
| Hypertension <sup>†</sup> , %              | 48                           | 48            | 50           | 49           | 50           | 46          |
| Hypercholesterolemia <sup>†</sup> , %      | 56                           | 58            | 56           | 49           | 48           | 45          |
| Type 2 diabetes <sup>‡</sup> , %           | 4                            | 5             | 6            | 8            | 9            | 10          |
| Current multivitamin use, %                | 55                           | 58            | 61           | 58           | 57           | 54          |
| Current statin use, %                      | 19                           | 18            | 16           | 10           | 8            | 9           |
| Dietary intake                             |                              |               |              |              |              |             |
| Total Energy, kcal/day                     | 1,489 (410)                  | 1,543 (387)   | 1,718 (398)  | 1,864 (450)  | 1,901 (479)  | 1,940 (519) |
| Whole egg consumption, unit/day            | 0.01 (0.01)                  | 0.09 (0.03)   | 0.27 (0.08)  | 0.50 (0.08)  | 0.81 (0.07)  | 1.38 (0.55) |
| Bacon, servings/day                        | 0.04 (0.07)                  | 0.05 (0.07)   | 0.08 (0.09)  | 0.13 (0.13)  | 0.18 (0.22)  | 0.20 (0.33) |
| Unprocessed red meat, servings/day         | 0.72 (0.49)                  | 0.74 (0.41)   | 0.81 (0.41)  | 0.97 (0.49)  | 1.05 (0.63)  | 1.07 (0.71) |
| Other processed meat, servings/day         | 0.13 (0.17)                  | 0.15 (0.16)   | 0.19 (0.17)  | 0.24 (0.22)  | 0.25 (0.25)  | 0.27 (0.32) |
| Refined grains, servings/day               | 1.08 (0.75)                  | 1.11 (0.72)   | 1.26 (0.76)  | 1.43 (0.90)  | 1.46 (1.08)  | 1.52 (1.22) |
| Potatoes, servings/day                     | 0.43 (0.29)                  | 0.43 (0.27)   | 0.48 (0.27)  | 0.52 (0.30)  | 0.53 (0.38)  | 0.51 (0.38) |
| Full-fat milk, servings/day                | 0.11 (0.31)                  | 0.12 (0.29)   | 0.13 (0.30)  | 0.19 (0.41)  | 0.24 (0.47)  | 0.30 (0.58) |
| Coffee, servings/day                       | 2.10 (1.60)                  | 2.12 (1.50)   | 2.22 (1.48)  | 2.34 (1.59)  | 2.44 (1.73)  | 2.35 (1.78) |
| Juice, servings/day                        | 0.63 (0.58)                  | 0.65 (0.55)   | 0.73 (0.55)  | 0.79 (0.60)  | 0.77 (0.61)  | 0.76 (0.67) |
| Sugar sweetened beverages, servings/day    | 0.32 (0.56)                  | 0.32 (0.51)   | 0.30 (0.46)  | 0.34 (0.51)  | 0.37 (0.63)  | 0.37 (0.65) |
| Fruits, servings/day                       | 1.72 (1.20)                  | 1.69 (1.01)   | 1.85 (0.97)  | 1.96 (1.08)  | 1.98 (1.18)  | 2.04 (1.40) |
| Vegetables, servings/day                   | 3.18 (1.69)                  | 3.12 (1.51)   | 3.40 (1.50)  | 3.43 (1.63)  | 3.38 (1.80)  | 3.27 (1.91) |
| Protein, %                                 | 18.3 (3.1)                   | 18.1 (2.7)    | 18.4 (2.5)   | 18.5 (2.7)   | 18.8 (2.9)   | 19.3 (3.4)  |
| Carbohydrates, %                           | 49.3 (8.3)                   | 48.8 (7.1)    | 47.8 (6.3)   | 45.5 (6.6)   | 43.4 (7.4)   | 41.7 (8.5)  |
| Total fat, %                               | 31.5 (6.3)                   | 32.2 (5.2)    | 33.0 (4.7)   | 35.0 (5.0)   | 36.6 (5.7)   | 37.7 (6.4)  |
| Saturated fat, %                           | 11.4 (3.0)                   | 11.6 (2.4)    | 11.8 (2.1)   | 12.8 (2.4)   | 13.5 (2.8)   | 14.0 (3.1)  |
| Trans fat, g/day                           | 2.78 (1.27)                  | 2.94 (1.17)   | 3.34 (1.22)  | 3.82 (1.41)  | 3.96 (1.60)  | 4.00 (1.76) |
| Cholesterol, mg/day                        | 173 (57)                     | 199 (52)      | 262 (59)     | 342 (66)     | 433 (77)     | 581 (176)   |

|                                                     |             |             |             |             |             |             |
|-----------------------------------------------------|-------------|-------------|-------------|-------------|-------------|-------------|
| Alcohol, g/day                                      | 5.4 (8.8)   | 5.6 (8.7)   | 5.8 (8.5)   | 6.2 (9.3)   | 6.1 (9.4)   | 6.2 (11.1)  |
| <b>Nurses' Health Study II (1999)</b>               |             |             |             |             |             |             |
| Participants, n                                     | 9,479       | 36,697      | 33,243      | 9,002       | 815         | 443         |
| Age, years                                          | 44.3 (4.7)  | 44.0 (4.7)  | 44.3 (4.6)  | 44.6 (4.6)  | 45.0 (4.5)  | 45.3 (4.6)  |
| Body mass index, kg/m <sup>2</sup>                  | 25.5 (5.6)  | 26.2 (5.9)  | 26.8 (6.3)  | 27.5 (6.8)  | 28.0 (7.0)  | 29.0 (8.3)  |
| Physical activity, MET-hours/week                   | 22.8 (27.5) | 18.8 (23.5) | 17.8 (21.9) | 17.5 (22.0) | 17.4 (26.0) | 19.0 (28.1) |
| White race, %                                       | 96          | 96          | 97          | 96          | 95          | 95          |
| Smoking Status                                      |             |             |             |             |             |             |
| Never smoker, %                                     | 65          | 66          | 66          | 67          | 64          | 65          |
| Past smoker, %                                      | 26          | 25          | 25          | 23          | 27          | 26          |
| Current smoker, %                                   | 9           | 9           | 9           | 10          | 9           | 8           |
| Postmenopausal, %                                   | 18          | 18          | 19          | 17          | 18          | 18          |
| Current menopausal hormone use, %                   | 12          | 12          | 12          | 11          | 12          | 10          |
| Current oral contraceptive use, %                   | 8           | 8           | 8           | 7           | 7           | 8           |
| Family history of diabetes, %                       | 31          | 33          | 34          | 33          | 33          | 35          |
| Family history of myocardial infarction, %          | 34          | 34          | 34          | 32          | 33          | 31          |
| Hypertension <sup>†</sup> , %                       | 14          | 15          | 16          | 17          | 18          | 22          |
| Hypercholesterolemia <sup>†</sup> , %               | 25          | 24          | 24          | 23          | 23          | 25          |
| Type 2 diabetes <sup>‡</sup> , %                    | 1           | 1           | 2           | 2           | 3           | 2           |
| Current multivitamin use, %                         | 55          | 55          | 57          | 56          | 60          | 62          |
| Current statin use, %                               | 4           | 3           | 3           | 2           | 3           | 2           |
| Dietary intake                                      |             |             |             |             |             |             |
| Total Energy, kcal/day                              | 1,567 (451) | 1,698 (447) | 1,905 (466) | 2,110 (498) | 2,067 (543) | 2,149 (527) |
| Whole egg consumption, unit/day                     | 0.01 (0.01) | 0.08 (0.02) | 0.23 (0.07) | 0.46 (0.07) | 0.83 (0.07) | 1.32 (0.48) |
| Bacon, servings/day                                 | 0.02 (0.05) | 0.04 (0.05) | 0.07 (0.09) | 0.11 (0.14) | 0.18 (0.26) | 0.20 (0.28) |
| Unprocessed red meat, servings/day                  | 0.50 (0.40) | 0.64 (0.40) | 0.76 (0.44) | 0.87 (0.51) | 0.87 (0.55) | 0.91 (0.65) |
| Other processed meat, servings/day                  | 0.09 (0.14) | 0.14 (0.15) | 0.18 (0.17) | 0.23 (0.22) | 0.23 (0.25) | 0.26 (0.34) |
| Refined grains, servings/day                        | 1.37 (0.83) | 1.43 (0.79) | 1.62 (0.86) | 1.82 (0.99) | 1.68 (1.05) | 1.93 (1.36) |
| Potatoes, servings/day                              | 0.43 (0.31) | 0.49 (0.30) | 0.55 (0.32) | 0.62 (0.36) | 0.59 (0.47) | 0.59 (0.41) |
| Full-fat milk, servings/day                         | 0.03 (0.17) | 0.05 (0.20) | 0.06 (0.24) | 0.10 (0.32) | 0.10 (0.30) | 0.13 (0.42) |
| Coffee, servings/day                                | 1.44 (1.51) | 1.50 (1.48) | 1.58 (1.49) | 1.63 (1.58) | 1.68 (1.65) | 1.53 (1.63) |
| Juice, servings/day                                 | 0.56 (0.72) | 0.59 (0.62) | 0.68 (0.66) | 0.78 (0.74) | 0.68 (0.73) | 0.70 (0.71) |
| Sugar sweetened beverages, servings/day             | 0.41 (0.74) | 0.47 (0.73) | 0.50 (0.75) | 0.58 (0.83) | 0.49 (0.78) | 0.52 (1.04) |
| Fruits, servings/day                                | 1.23 (0.98) | 1.17 (0.82) | 1.26 (0.81) | 1.32 (0.88) | 1.34 (1.00) | 1.32 (0.96) |
| Vegetables, servings/day                            | 3.40 (2.16) | 3.27 (1.82) | 3.59 (1.86) | 3.80 (1.98) | 3.97 (2.17) | 4.01 (2.29) |
| Protein, %                                          | 18.8 (3.3)  | 18.8 (2.8)  | 18.8 (2.7)  | 18.7 (2.8)  | 19.3 (3.1)  | 19.7 (3.6)  |
| Carbohydrates, %                                    | 53.6 (7.9)  | 51.5 (6.6)  | 50.4 (6.3)  | 49.3 (6.4)  | 46.8 (7.4)  | 45.6 (8.3)  |
| Total fat, %                                        | 28.3 (6.0)  | 30.2 (5.0)  | 31.4 (4.8)  | 32.6 (4.8)  | 34.5 (5.5)  | 35.5 (6.3)  |
| Saturated fat, %                                    | 9.7 (2.51)  | 10.5 (2.1)  | 10.9 (2.1)  | 11.4 (2.1)  | 12.1 (2.4)  | 12.3 (2.6)  |
| Trans fat, g/day                                    | 2.50 (1.25) | 2.94 (1.23) | 3.37 (1.31) | 3.84 (1.47) | 3.72 (1.63) | 3.79 (1.57) |
| Cholesterol, mg/day                                 | 163 (62)    | 200 (59)    | 255 (65)    | 329 (72)    | 406 (77)    | 513 (137)   |
| Alcohol, g/day                                      | 3.1 (5.4)   | 3.3 (5.6)   | 3.6 (6.0)   | 3.7 (6.5)   | 3.4 (6.7)   | 2.8 (5.8)   |
| <b>Health Professionals' Follow-up Study (1998)</b> |             |             |             |             |             |             |
| Participants, n                                     | 4,814       | 10,302      | 13,972      | 6,380       | 1,061       | 1,001       |

|                                            |             |             |             |             |             |             |
|--------------------------------------------|-------------|-------------|-------------|-------------|-------------|-------------|
| Age, years                                 | 63.8 (8.9)  | 63.6 (9.0)  | 64.4 (9.2)  | 65.3 (9.2)  | 64.9 (9.1)  | 65.5 (9.1)  |
| Body mass index, kg/m <sup>2</sup>         | 25.4 (3.6)  | 26.0 (3.5)  | 26.3 (3.6)  | 26.7 (4.4)  | 26.6 (3.8)  | 26.5 (4.1)  |
| Physical activity, MET-hours/week          | 37.2 (41.3) | 35.3 (41.1) | 33.0 (37.8) | 33.1 (39.7) | 33.5 (38.2) | 37.6 (46.4) |
| White race, %                              | 94          | 95          | 95          | 95          | 95          | 95          |
| Smoking Status                             |             |             |             |             |             |             |
| Never smoker, %                            | 55          | 52          | 49          | 47          | 45          | 46          |
| Past smoker, %                             | 42          | 44          | 44          | 44          | 43          | 42          |
| Current smoker, %                          | 3           | 5           | 6           | 9           | 12          | 12          |
| Family history of diabetes, %              | 15          | 14          | 14          | 13          | 14          | 10          |
| Family history of myocardial infarction, % | 38          | 33          | 30          | 29          | 27          | 25          |
| Hypertension <sup>†</sup> , %              | 42          | 42          | 42          | 40          | 37          | 34          |
| Hypercholesterolemia <sup>†</sup> , %      | 54          | 50          | 46          | 37          | 35          | 31          |
| Type 2 diabetes <sup>‡</sup> , %           | 3           | 4           | 5           | 6           | 7           | 8           |
| Current multivitamin use, %                | 63          | 61          | 60          | 61          | 62          | 62          |
| Current statin use, %                      | 22          | 17          | 13          | 7           | 6           | 5           |
| Dietary intake                             |             |             |             |             |             |             |
| Total Energy, kcal/day                     | 1,778 (491) | 1,856 (488) | 2,013 (515) | 2,181 (576) | 2,268 (573) | 2,367 (592) |
| Whole egg consumption, unit/day            | 0.01 (0.01) | 0.08 (0.03) | 0.25 (0.08) | 0.48 (0.08) | 0.82 (0.07) | 1.56 (0.56) |
| Bacon, servings/day                        | 0.02 (0.06) | 0.05 (0.08) | 0.09 (0.12) | 0.16 (0.18) | 0.25 (0.26) | 0.34 (0.41) |
| Unprocessed red meat, servings/day         | 0.47 (0.46) | 0.64 (0.44) | 0.78 (0.47) | 0.93 (0.54) | 1.01 (0.58) | 1.17 (0.72) |
| Other processed meat, servings/day         | 0.10 (0.19) | 0.16 (0.19) | 0.23 (0.23) | 0.28 (0.28) | 0.31 (0.31) | 0.34 (0.39) |
| Refined grains, servings/day               | 1.18 (0.83) | 1.18 (0.80) | 1.30 (0.84) | 1.43 (0.97) | 1.55 (1.04) | 1.57 (1.21) |
| Potatoes, servings/day                     | 0.46 (0.34) | 0.50 (0.32) | 0.56 (0.33) | 0.62 (0.37) | 0.66 (0.40) | 0.69 (0.41) |
| Full-fat milk, servings/day                | 0.03 (0.17) | 0.06 (0.25) | 0.10 (0.30) | 0.16 (0.40) | 0.23 (0.52) | 0.29 (0.59) |
| Coffee, servings/day                       | 1.49 (1.46) | 1.74 (1.51) | 1.92 (1.54) | 2.10 (1.61) | 2.14 (1.59) | 2.36 (1.87) |
| Juice, servings/day                        | 0.83 (0.78) | 0.78 (0.67) | 0.80 (0.65) | 0.82 (0.76) | 0.79 (0.69) | 0.80 (0.75) |
| Sugar sweetened beverages, servings/day    | 0.28 (0.49) | 0.33 (0.50) | 0.36 (0.51) | 0.41 (0.56) | 0.42 (0.56) | 0.40 (0.56) |
| Fruits, servings/day                       | 1.95 (1.50) | 1.70 (1.20) | 1.62 (1.06) | 1.59 (1.08) | 1.62 (1.15) | 1.53 (1.12) |
| Vegetables, servings/day                   | 3.99 (2.37) | 3.67 (1.89) | 3.68 (1.83) | 3.75 (1.85) | 3.87 (1.98) | 3.81 (1.99) |
| Protein, %                                 | 18.4 (3.1)  | 18.1 (2.7)  | 18.0 (2.6)  | 18.0 (2.7)  | 18.3 (2.6)  | 18.7 (2.7)  |
| Carbohydrates, %                           | 53.8 (8.5)  | 50.6 (7.4)  | 48.6 (6.7)  | 46.6 (6.7)  | 45.2 (6.4)  | 43.2 (7.2)  |
| Total fat, %                               | 26.8 (6.1)  | 29.7 (5.2)  | 31.4 (4.9)  | 33.1 (4.8)  | 34.4 (4.8)  | 35.9 (5.3)  |
| Saturated fat, %                           | 8.4 (2.5)   | 9.7 (2.2)   | 10.5 (2.1)  | 11.3 (2.2)  | 11.8 (2.2)  | 12.5 (2.4)  |
| Trans fat, g/day                           | 2.32 (1.28) | 2.84 (1.32) | 3.32 (1.45) | 3.70 (1.66) | 3.86 (1.71) | 3.99 (1.74) |
| Cholesterol, mg/day                        | 181 (67)    | 217 (65)    | 273 (73)    | 349 (83)    | 438 (85)    | 604 (156)   |
| Alcohol, g/day                             | 9.0 (12.6)  | 10.1 (12.6) | 11.4 (13.3) | 12.4 (14.5) | 11.8 (13.9) | 12.0 (15.8) |

\* All variables except age are age-standardized. Values are mean (SD) or percentage.

<sup>†</sup>Includes prevalent cases before baseline and incident cases until the return of the 1998 questionnaire (1999 in NHS II).

<sup>‡</sup>Includes incident cases until the return of the 1998 questionnaire (1999 in NHS II).

**Supplemental Table 3:** Multivariable adjusted hazard ratios (95% confidence intervals) for incident cardiovascular disease according to categories of whole egg consumption.

|                                              | Frequency of Egg Consumption* |                   |                   |                   |                   |                   | P value for trend <sup>†</sup> | HR (95% CI) per 1 egg per day increase |
|----------------------------------------------|-------------------------------|-------------------|-------------------|-------------------|-------------------|-------------------|--------------------------------|----------------------------------------|
|                                              | <1/month                      | 1 to <4/month     | 1 to <3/week      | 3 to <5/week      | 5 to <7/week      | ≥1/day            |                                |                                        |
| <b>Nurses' Health Study</b>                  |                               |                   |                   |                   |                   |                   |                                |                                        |
| Cases/Person years                           | 291/83 722                    | 1 494/404 893     | 3 701/1 093 801   | 1 534/646 761     | 230/103 726       | 161/74 012        |                                |                                        |
| Model 1                                      | 1.00 (Ref.)                   | 0.96 (0.85, 1.09) | 0.91 (0.81, 1.03) | 0.94 (0.83, 1.07) | 0.98 (0.82, 1.17) | 1.06 (0.87, 1.29) | 0.59                           | 1.06 (0.96, 1.16)                      |
| Model 2                                      | 1.00 (Ref.)                   | 1.02 (0.90, 1.16) | 1.00 (0.88, 1.12) | 0.98 (0.86, 1.11) | 0.97 (0.82, 1.16) | 1.02 (0.84, 1.24) | 0.50                           | 1.01 (0.92, 1.11)                      |
| Model 3                                      | 1.00 (Ref.)                   | 1.01 (0.89, 1.14) | 0.96 (0.84, 1.08) | 0.91 (0.79, 1.03) | 0.90 (0.75, 1.07) | 0.93 (0.77, 1.14) | 0.03                           | 0.94 (0.85, 1.04)                      |
| <b>Nurses' Health Study II</b>               |                               |                   |                   |                   |                   |                   |                                |                                        |
| Cases/Person years                           | 130/259 156                   | 414/783 358       | 520/771 069       | 126/285 402       | 28/25 668         | 7/13 286          |                                |                                        |
| Model 1                                      | 1.00 (Ref.)                   | 0.91 (0.75, 1.11) | 1.08 (0.89, 1.31) | 0.93 (0.73, 1.19) | 1.84 (1.22, 2.77) | 0.85 (0.39, 1.82) | 0.08                           | 1.30 (0.99, 1.70)                      |
| Model 2                                      | 1.00 (Ref.)                   | 0.89 (0.73, 1.08) | 1.03 (0.84, 1.25) | 0.85 (0.66, 1.09) | 1.54 (1.02, 2.33) | 0.74 (0.35, 1.59) | 0.47                           | 1.13 (0.85, 1.50)                      |
| Model 3                                      | 1.00 (Ref.)                   | 0.84 (0.69, 1.03) | 0.95 (0.77, 1.17) | 0.76 (0.59, 0.99) | 1.32 (0.86, 2.02) | 0.61 (0.28, 1.31) | 0.76                           | 0.97 (0.71, 1.33)                      |
| <b>Health Professionals' Follow-up Study</b> |                               |                   |                   |                   |                   |                   |                                |                                        |
| Cases/Person years                           | 637/114 452                   | 1 456/247 843     | 2 195/332 204     | 1 382/226 997     | 275/37 536        | 225/36 428        |                                |                                        |
| Model 1                                      | 1.00 (Ref.)                   | 1.02 (0.93, 1.12) | 1.07 (0.98, 1.17) | 1.09 (0.99, 1.20) | 1.29 (1.12, 1.49) | 1.11 (0.95, 1.29) | 0.003                          | 1.10 (1.02, 1.18)                      |
| Model 2                                      | 1.00 (Ref.)                   | 1.01 (0.92, 1.11) | 1.05 (0.96, 1.16) | 1.04 (0.95, 1.15) | 1.23 (1.06, 1.42) | 1.05 (0.90, 1.22) | 0.07                           | 1.06 (0.98, 1.14)                      |
| Model 3                                      | 1.00 (Ref.)                   | 0.99 (0.90, 1.09) | 1.01 (0.92, 1.11) | 0.98 (0.88, 1.09) | 1.13 (0.97, 1.32) | 0.97 (0.82, 1.14) | 0.80                           | 1.01 (0.93, 1.10)                      |
| <b>Pooled Results</b>                        |                               |                   |                   |                   |                   |                   |                                |                                        |
| Cases/Person years                           | 1 058/457 330                 | 3 364/1 436 094   | 6 416/2 197 074   | 3 042/1 159 160   | 533/166 930       | 393/123 726       |                                |                                        |
| Model 1                                      | 1.00 (Ref.)                   | 1.00 (0.93, 1.08) | 1.01 (0.95, 1.08) | 1.03 (0.96, 1.11) | 1.18 (1.06, 1.31) | 1.10 (0.97, 1.23) | 0.002                          | 1.09 (1.03, 1.15)                      |
| Model 2                                      | 1.00 (Ref.)                   | 1.01 (0.94, 1.09) | 1.03 (0.97, 1.11) | 1.01 (0.94, 1.08) | 1.12 (1.01, 1.25) | 1.03 (0.91, 1.16) | 0.22                           | 1.04 (0.98, 1.10)                      |
| Model 3                                      | 1.00 (Ref.)                   | 0.98 (0.91, 1.06) | 0.98 (0.91, 1.05) | 0.92 (0.85, 1.00) | 1.01 (0.90, 1.13) | 0.93 (0.82, 1.05) | 0.16                           | 0.98 (0.92, 1.04)                      |

\*Multivariable adjusted hazard ratios (HR) were estimated from Cox proportional hazards models.

Model 1: adjusted for age (months), and stratified by calendar time (in 2-year intervals) and cohort.

Model 2: model 1 + race (Caucasian, other), family history of myocardial infarction (yes, no), baseline hypercholesterolemia (yes, no), baseline hypertension (yes, no), smoking status (never, former, current), body mass index (kg/m<sup>2</sup>: categorical <21.0, 21.0-22.9, 23.0-24.9, 25.0-26.9, 27.0-29.9, 30.0-34.9, ≥35.0), physical activity (metabolic equivalent of task-hours/week: categorical <3.0, 3.0-8.9, 9.0-17.9, 18.0-26.9, ≥27.0), oral contraceptive use (never, former, current, in NHS II only), postmenopausal hormone use (premenopausal, never, former, current, in NHS and NHS II), alcohol intake (g/d in quintiles), and multivitamin use (yes, no). All covariates (except race, family history of myocardial infarction, baseline hypercholesterolemia and hypertension) were updated every 2 years.

Model 3: model 2 + updated cumulative average of daily intake of total calories (kcal/d in quintiles), full-fat milk (servings/d in categories), bacon (servings/d in categories), red meat (servings/d in categories), other processed meats (servings/d in categories), refined grains (servings/d in categories), fruits (servings/d in categories), vegetables (servings/d in categories), potatoes (servings/d in categories), coffee (servings/d in categories), fruit juices (servings/d in categories), and sugar-sweetened beverages (servings/d in categories).

<sup>†</sup>P values for trend based on continuous egg variable.

**Supplemental Table 4:** Multivariable adjusted hazard ratios (95% confidence intervals) for incident coronary heart disease according to categories of whole egg consumption.

|                                              | Frequency of Egg Consumption* |                   |                   |                   |                   |                   | P value for trend <sup>†</sup> | HR (95% CI) per 1 egg per day increase |
|----------------------------------------------|-------------------------------|-------------------|-------------------|-------------------|-------------------|-------------------|--------------------------------|----------------------------------------|
|                                              | <1/month                      | 1 to <4/month     | 1 to <3/week      | 3 to <5/week      | 5 to <7/week      | ≥1/day            |                                |                                        |
| <b>Nurses' Health Study</b>                  |                               |                   |                   |                   |                   |                   |                                |                                        |
| Cases/Person years                           | 164/83 803                    | 763/405 392       | 1 881/1 095 105   | 858/647 254       | 137/103 790       | 93/74 064         |                                |                                        |
| Model 1                                      | 1.00 (Ref.)                   | 0.90 (0.76, 1.06) | 0.85 (0.72, 0.99) | 0.90 (0.76, 1.06) | 0.99 (0.79, 1.24) | 1.00 (0.77, 1.29) | 0.38                           | 1.06 (0.94, 1.20)                      |
| Model 2                                      | 1.00 (Ref.)                   | 0.96 (0.81, 1.14) | 0.95 (0.80, 1.11) | 0.95 (0.80, 1.13) | 1.00 (0.79, 1.25) | 0.98 (0.75, 1.26) | 0.93                           | 1.02 (0.90, 1.16)                      |
| Model 3                                      | 1.00 (Ref.)                   | 0.94 (0.79, 1.12) | 0.89 (0.76, 1.05) | 0.85 (0.71, 1.01) | 0.88 (0.69, 1.11) | 0.85 (0.65, 1.11) | 0.10                           | 0.92 (0.80, 1.05)                      |
| <b>Nurses' Health Study II</b>               |                               |                   |                   |                   |                   |                   |                                |                                        |
| Cases/Person years                           | 72/259 214                    | 221/783 534       | 282/771 293       | 57/285 457        | 18/25 676         | 3/13 288          |                                |                                        |
| Model 1                                      | 1.00 (Ref.)                   | 0.86 (0.66, 1.13) | 1.03 (0.79, 1.33) | 0.76 (0.53, 1.07) | 2.05 (1.22, 3.45) | 0.61 (0.19, 1.96) | 0.45                           | 1.28 (0.89, 1.84)                      |
| Model 2                                      | 1.00 (Ref.)                   | 0.82 (0.63, 1.07) | 0.96 (0.73, 1.25) | 0.66 (0.47, 0.94) | 1.62 (0.96, 2.74) | 0.55 (0.17, 1.76) | 0.91                           | 1.10 (0.75, 1.62)                      |
| Model 3                                      | 1.00 (Ref.)                   | 0.77 (0.59, 1.01) | 0.86 (0.65, 1.14) | 0.56 (0.39, 0.81) | 1.31 (0.75, 2.27) | 0.43 (0.13, 1.38) | 0.28                           | 0.91 (0.59, 1.42)                      |
| <b>Health Professionals' Follow-up Study</b> |                               |                   |                   |                   |                   |                   |                                |                                        |
| Cases/Person years                           | 458/114 595                   | 1 056/248 170     | 1 564/332 672     | 1 022/227 282     | 194/37 590        | 167/36 478        |                                |                                        |
| Model 1                                      | 1.00 (Ref.)                   | 1.04 (0.93, 1.16) | 1.08 (0.97, 1.20) | 1.12 (1.00, 1.26) | 1.26 (1.06, 1.49) | 1.14 (0.95, 1.37) | 0.008                          | 1.09 (1.00, 1.18)                      |
| Model 2                                      | 1.00 (Ref.)                   | 1.03 (0.92, 1.15) | 1.07 (0.96, 1.19) | 1.09 (0.97, 1.22) | 1.20 (1.01, 1.43) | 1.09 (0.90, 1.30) | 0.07                           | 1.06 (0.97, 1.15)                      |
| Model 3                                      | 1.00 (Ref.)                   | 1.00 (0.89, 1.12) | 1.02 (0.91, 1.14) | 1.01 (0.89, 1.14) | 1.09 (0.91, 1.31) | 0.99 (0.82, 1.20) | 0.80                           | 1.00 (0.91, 1.10)                      |
| <b>Pooled Results</b>                        |                               |                   |                   |                   |                   |                   |                                |                                        |
| Cases/Person years                           | 694/457 612                   | 2 040/1 437 096   | 3 727/2 199 070   | 1 937/1 159 993   | 349/167 056       | 263/123 830       |                                |                                        |
| Model 1                                      | 1.00 (Ref.)                   | 0.99 (0.91, 1.08) | 1.00 (0.92, 1.09) | 1.04 (0.95, 1.14) | 1.19 (1.05, 1.36) | 1.09 (0.95, 1.26) | 0.003                          | 1.09 (1.01, 1.16)                      |
| Model 2                                      | 1.00 (Ref.)                   | 1.00 (0.91, 1.09) | 1.03 (0.95, 1.12) | 1.02 (0.93, 1.11) | 1.14 (1.00, 1.30) | 1.03 (0.89, 1.20) | 0.13                           | 1.05 (0.98, 1.12)                      |
| Model 3                                      | 1.00 (Ref.)                   | 0.96 (0.88, 1.05) | 0.96 (0.88, 1.05) | 0.91 (0.83, 1.00) | 0.99 (0.86, 1.14) | 0.90 (0.77, 1.05) | 0.22                           | 0.96 (0.89, 1.04)                      |

\*Multivariable adjusted hazard ratios (HR) were estimated from Cox proportional hazards models.

Model 1: adjusted for age (months), and stratified by calendar time (in 2-year intervals) and cohort.

Model 2: model 1 + race (Caucasian, other), family history of myocardial infarction (yes, no), baseline hypercholesterolemia (yes, no), baseline hypertension (yes, no), smoking status (never, former, current), body mass index (kg/m<sup>2</sup>: categorical <21.0, 21.0-22.9, 23.0-24.9, 25.0-26.9, 27.0-29.9, 30.0-34.9, ≥35.0), physical activity (metabolic equivalent of task-hours/week: categorical <3.0, 3.0-8.9, 9.0-17.9, 18.0-26.9, ≥27.0), oral contraceptive use (never, former, current, in NHS II only), postmenopausal hormone use (premenopausal, never, former, current, in NHS and NHS II), alcohol intake (g/d in quintiles), and multivitamin use (yes, no). All covariates (except race, family history of myocardial infarction, baseline hypercholesterolemia and hypertension) were updated every 2 years.

Model 3: model 2 + updated cumulative average of daily intake of total calories (kcal/d in quintiles), full-fat milk (servings/d in categories), bacon (servings/d in categories), red meat (servings/d in categories), other processed meats (servings/d in categories), refined grains (servings/d in categories), fruits (servings/d in categories), vegetables (servings/d in categories), potatoes (servings/d in categories), coffee (servings/d in categories), fruit juices (servings/d in categories), and sugar-sweetened beverages (servings/d in categories).

<sup>†</sup>P values for trend based on continuous egg variable.

**Supplemental Table 5:** Multivariable adjusted hazard ratios (95% confidence intervals) for incident stroke according to categories of whole egg consumption.

|                                              | Frequency of Egg Consumption* |                   |                   |                   |                   |                   | P value for trend† | HR (95% CI) per 1 egg per day increase |
|----------------------------------------------|-------------------------------|-------------------|-------------------|-------------------|-------------------|-------------------|--------------------|----------------------------------------|
|                                              | <1/month                      | 1 to <4/month     | 1 to <3/week      | 3 to <5/week      | 5 to <7/week      | ≥1/day            |                    |                                        |
| <b>Nurses' Health Study</b>                  |                               |                   |                   |                   |                   |                   |                    |                                        |
| Cases/Person years                           | 130/83 817                    | 747/405 360       | 1 862/1 094 983   | 684/647 309       | 95/103 795        | 69/74 065         |                    |                                        |
| Model 1                                      | 1.00 (Ref.)                   | 1.04 (0.87, 1.26) | 1.00 (0.83, 1.19) | 0.98 (0.81, 1.19) | 0.96 (0.74, 1.26) | 1.13 (0.84, 1.52) | 0.73               | 1.04 (0.90, 1.19)                      |
| Model 2                                      | 1.00 (Ref.)                   | 1.09 (0.91, 1.32) | 1.05 (0.88, 1.26) | 1.00 (0.83, 1.21) | 0.94 (0.72, 1.22) | 1.07 (0.79, 1.44) | 0.22               | 0.98 (0.85, 1.13)                      |
| Model 3                                      | 1.00 (Ref.)                   | 1.09 (0.90, 1.31) | 1.03 (0.86, 1.24) | 0.97 (0.79, 1.17) | 0.91 (0.69, 1.20) | 1.04 (0.77, 1.40) | 0.13               | 0.96 (0.83, 1.12)                      |
| <b>Nurses' Health Study II</b>               |                               |                   |                   |                   |                   |                   |                    |                                        |
| Cases/Person years                           | 59/259 216                    | 194/783 545       | 239/771 290       | 69/285 454        | 11/25 679         | 4/13 287          |                    |                                        |
| Model 1                                      | 1.00 (Ref.)                   | 0.96 (0.71, 1.28) | 1.12 (0.84, 1.50) | 1.13 (0.79, 1.60) | 1.65 (0.87, 3.16) | 1.15 (0.41, 3.16) | 0.07               | 1.34 (0.90, 2.00)                      |
| Model 2                                      | 1.00 (Ref.)                   | 0.95 (0.71, 1.27) | 1.09 (0.81, 1.45) | 1.07 (0.75, 1.53) | 1.46 (0.76, 2.80) | 1.00 (0.36, 2.76) | 0.21               | 1.18 (0.78, 1.79)                      |
| Model 3                                      | 1.00 (Ref.)                   | 0.91 (0.67, 1.22) | 1.03 (0.76, 1.40) | 1.03 (0.71, 1.50) | 1.33 (0.68, 2.59) | 0.86 (0.31, 2.42) | 0.40               | 1.08 (0.69, 1.68)                      |
| <b>Health Professionals' Follow-up Study</b> |                               |                   |                   |                   |                   |                   |                    |                                        |
| Cases/Person years                           | 182/114 705                   | 404/248 433       | 641/332 984       | 368/227 520       | 83/37 637         | 62/36 501         |                    |                                        |
| Model 1                                      | 1.00 (Ref.)                   | 0.98 (0.82, 1.17) | 1.05 (0.88, 1.24) | 1.01 (0.84, 1.21) | 1.39 (1.07, 1.81) | 1.08 (0.81, 1.45) | 0.09               | 1.15 (1.00, 1.31)                      |
| Model 2                                      | 1.00 (Ref.)                   | 0.96 (0.80, 1.15) | 1.01 (0.85, 1.20) | 0.95 (0.79, 1.14) | 1.31 (1.00, 1.72) | 1.01 (0.75, 1.36) | 0.33               | 1.09 (0.95, 1.25)                      |
| Model 3                                      | 1.00 (Ref.)                   | 0.95 (0.79, 1.15) | 0.98 (0.82, 1.18) | 0.90 (0.74, 1.11) | 1.24 (0.93, 1.66) | 0.97 (0.71, 1.33) | 0.64               | 1.07 (0.92, 1.24)                      |
| <b>Pooled Results</b>                        |                               |                   |                   |                   |                   |                   |                    |                                        |
| Cases/Person years                           | 371/457 738                   | 1 345/1 437 338   | 2 742/2 199 257   | 1 121/1 160 283   | 189/167 111       | 135/123 853       |                    |                                        |
| Model 1                                      | 1.00 (Ref.)                   | 1.02 (0.90, 1.14) | 1.03 (0.92, 1.15) | 1.01 (0.89, 1.14) | 1.16 (0.97, 1.38) | 1.12 (0.92, 1.37) | 0.16               | 1.10 (1.00, 1.21)                      |
| Model 2                                      | 1.00 (Ref.)                   | 1.03 (0.91, 1.15) | 1.04 (0.93, 1.16) | 0.98 (0.87, 1.11) | 1.10 (0.92, 1.31) | 1.04 (0.85, 1.28) | 0.88               | 1.04 (0.95, 1.15)                      |
| Model 3                                      | 1.00 (Ref.)                   | 1.01 (0.90, 1.14) | 1.00 (0.89, 1.13) | 0.94 (0.82, 1.06) | 1.04 (0.86, 1.25) | 0.99 (0.81, 1.22) | 0.53               | 1.01 (0.91, 1.12)                      |

\*Multivariable adjusted hazard ratios (HR) were estimated from Cox proportional hazards models.

Model 1: adjusted for age (months), and stratified by calendar time (in 2-year intervals) and cohort.

Model 2: model 1 + race (Caucasian, other), family history of myocardial infarction (yes, no), baseline hypercholesterolemia (yes, no), baseline hypertension (yes, no), smoking status (never, former, current), body mass index (kg/m<sup>2</sup>: categorical <21.0, 21.0-22.9, 23.0-24.9, 25.0-26.9, 27.0-29.9, 30.0-34.9, ≥35.0), physical activity (metabolic equivalent of task-hours/week: categorical <3.0, 3.0-8.9, 9.0-17.9, 18.0-26.9, ≥27.0), oral contraceptive use (never, former, current, in NHS II only), postmenopausal hormone use (premenopausal, never, former, current, in NHS and NHS II), alcohol intake (g/d in quintiles), and multivitamin use (yes, no). All covariates (except race, family history of myocardial infarction, baseline hypercholesterolemia and hypertension) were updated every 2 years.

Model 3: model 2 + updated cumulative average of daily intake of total calories (kcal/d in quintiles), full-fat milk (servings/d in categories), bacon (servings/d in categories), red meat (servings/d in categories), other processed meats (servings/d in categories), refined grains (servings/d in categories), fruits (servings/d in categories), vegetables (servings/d in categories), potatoes (servings/d in categories), coffee (servings/d in categories), fruit juices (servings/d in categories), and sugar-sweetened beverages (servings/d in categories).

†P values for trend based on continuous egg variable.



**Supplemental Table 6:** Multivariable adjusted hazard ratios (95% confidence intervals) for incident cardiovascular disease according to categories of whole egg consumption: pooled results from the Nurses' Health Study, the Nurses' Health Study II, and the Health Professional's Follow-up Study using fixed-effects meta-analysis.

|                                     | Frequency of Egg Consumption* |                   |                   |                   |                   |                   | P value for trend <sup>†</sup> | HR (95% CI) per 1 egg per day increase |
|-------------------------------------|-------------------------------|-------------------|-------------------|-------------------|-------------------|-------------------|--------------------------------|----------------------------------------|
|                                     | <1/month                      | 1 to <4/month     | 1 to <3/week      | 3 to <5/week      | 5 to <7/week      | ≥1/day            |                                |                                        |
| <b>Total cardiovascular disease</b> |                               |                   |                   |                   |                   |                   |                                |                                        |
| Cases/Person years                  | 1 058/457 330                 | 3 364/1 436 094   | 6 416/2 197 074   | 3 042/1 159 160   | 533/166 930       | 393/123 726       |                                |                                        |
| Model 3                             | 1.00 (Ref.)                   | 0.98 (0.91, 1.05) | 0.98 (0.92, 1.06) | 0.93 (0.86, 1.01) | 1.04 (0.93, 1.17) | 0.94 (0.83, 1.07) | 0.23                           | 0.98 (0.92, 1.04)                      |
| <b>Coronary heart disease</b>       |                               |                   |                   |                   |                   |                   |                                |                                        |
| Cases/Person years                  | 694/457 612                   | 2 040/1 437 096   | 3 727/2 199 070   | 1 937/1 159 993   | 349/167 056       | 263/123 830       |                                |                                        |
| Model 3                             | 1.00 (Ref.)                   | 0.96 (0.87, 1.05) | 0.96 (0.88, 1.05) | 0.92 (0.83, 1.01) | 1.02 (0.89, 1.18) | 0.93 (0.79, 1.08) | 0.35                           | 0.97 (0.90, 1.05)                      |
| <b>Stroke</b>                       |                               |                   |                   |                   |                   |                   |                                |                                        |
| Cases/Person years                  | 371/457 738                   | 1 345/1 437 338   | 2 742/2 199 257   | 1 121/1 160 283   | 189/167 111       | 135/123 853       |                                |                                        |
| Model 3                             | 1.00 (Ref.)                   | 1.00 (0.88, 1.13) | 1.01 (0.90, 1.14) | 0.95 (0.83, 1.08) | 1.08 (0.89, 1.30) | 1.00 (0.81, 1.24) | 0.62                           | 1.02 (0.92, 1.13)                      |

\*Multivariable adjusted hazard ratios were estimated from Cox proportional hazards models.

Model 3: stratified by calendar time (in 2-year intervals) and cohort, and adjusted for age (months), race (Caucasian, other), family history of myocardial infarction (yes, no), baseline hypercholesterolemia (yes, no), baseline hypertension (yes, no), smoking status (never, former, current), body mass index (kg/m<sup>2</sup>: categorical <21.0, 21.0-22.9, 23.0-24.9, 25.0-26.9, 27.0-29.9, 30.0-34.9, ≥35.0), physical activity (metabolic equivalent of task-hours/week: categorical <3.0, 3.0-8.9, 9.0-17.9, 18.0-26.9, ≥27.0), oral contraceptive use (never, former, current, in NHS II only), postmenopausal hormone use (premenopausal, never, former, current, in NHS and NHS II), alcohol intake (g/d in quintiles), and multivitamin use (yes, no). Model also included updated cumulative average of daily intake of total calories (kcal/d in quintiles), full-fat milk (servings/d in categories), bacon (servings/d in categories), red meat (servings/d in categories), other processed meats (servings/d in categories), refined grains (servings/d in categories), fruits (servings/d in categories), vegetables (servings/d in categories), potatoes (servings/d in categories), coffee (servings/d in categories), fruit juices (servings/d in categories), and sugar-sweetened beverages (servings/d in categories). All covariates (except race, family history of myocardial infarction, baseline hypercholesterolemia and hypertension) were updated every 2 years.

<sup>†</sup>P values for trend based on continuous egg variable.

**Supplemental Table 7:** Hazard ratios (95% confidence intervals) of incident cardiovascular disease according to seven categories of egg consumption.

|                    | Frequency of Egg Consumption* |                   |                   |                   |                   |                   |                   | <i>P</i> value for trend <sup>†</sup> |
|--------------------|-------------------------------|-------------------|-------------------|-------------------|-------------------|-------------------|-------------------|---------------------------------------|
|                    | <1/month                      | 1 to <4/month     | 1 to <3/week      | 3 to <5/week      | 5 to <7/week      | 1 to <2/day       | ≥2/day            |                                       |
| Cases/Person-years | 1 058/457 330                 | 3 364/1 436 094   | 6 416/2 197 074   | 3 042/1 159 160   | 533/166 930       | 311/101 530       | 82/22 198         |                                       |
| NHS                | 1.00 (Ref.)                   | 1.01 (0.89, 1.14) | 0.96 (0.84, 1.08) | 0.91 (0.79, 1.03) | 0.90 (0.75, 1.07) | 0.96 (0.78, 1.18) | 0.80 (0.51, 1.27) | 0.04                                  |
| NHS II             | 1.00 (Ref.)                   | 0.84 (0.69, 1.03) | 0.95 (0.77, 1.17) | 0.76 (0.59, 0.99) | 1.32 (0.86, 2.02) | 0.58 (0.25, 1.32) | 0.89 (0.12, 6.48) | 0.80                                  |
| HPFS               | 1.00 (Ref.)                   | 0.99 (0.90, 1.09) | 1.01 (0.92, 1.11) | 0.98 (0.88, 1.09) | 1.13 (0.97, 1.32) | 0.96 (0.80, 1.15) | 1.01 (0.77, 1.33) | 0.77                                  |
| Pooled Results     | 1.00 (Ref.)                   | 0.98 (0.91, 1.06) | 0.98 (0.91, 1.05) | 0.92 (0.85, 1.00) | 1.01 (0.90, 1.13) | 0.93 (0.81, 1.06) | 0.91 (0.72, 1.15) | 0.20                                  |

\* All results are stratified by calendar time (in 2-year intervals) and cohort, and adjusted for age (months), race (Caucasian, other), family history of myocardial infarction (yes, no), baseline hypercholesterolemia (yes, no), baseline hypertension (yes, no), smoking status (never, former, current), body mass index (kg/m<sup>2</sup>: categorical <21.0, 21.0-22.9, 23.0-24.9, 25.0-26.9, 27.0-29.9, 30.0-34.9, ≥35.0), physical activity (metabolic equivalent of task-hours/week: categorical <3.0, 3.0-8.9, 9.0-17.9, 18.0-26.9, ≥27.0), oral contraceptive use (never, former, current, in NHS II only), postmenopausal hormone use (premenopausal, never, former, current, in NHS and NHS II), alcohol intake (g/d in quintiles), and multivitamin use (yes, no). Model also included updated cumulative average of daily intake of total calories (kcal/d in quintiles), full-fat milk (servings/d in categories), bacon (servings/d in categories), red meat (servings/d in categories), other processed meats (servings/d in categories), refined grains (servings/d in categories), fruits (servings/d in categories), vegetables (servings/d in categories), potatoes (servings/d in categories), coffee (servings/d in categories), fruit juices (servings/d in categories), and sugar-sweetened beverages (servings/d in categories). All covariates (except race, family history of myocardial infarction, baseline hypercholesterolemia and hypertension) were updated every 2 years.

<sup>†</sup> *P* values for trend are based on continuous egg variable derived from the median egg intake in each category of consumption.

**Supplemental Table 8:** Multivariable adjusted hazard ratios (95% confidence intervals) for incident cardiovascular disease according to categories of whole egg consumption stratified by key variables.

| Variable                    | Cases/<br>Person<br>years | Frequency of Egg Consumption* |                      |                      |                      |                      |                      | P-trend <sup>†</sup> | HR (95% CI)<br>per 1 egg per<br>day increase | P-<br>interacti<br>on <sup>‡</sup> |
|-----------------------------|---------------------------|-------------------------------|----------------------|----------------------|----------------------|----------------------|----------------------|----------------------|----------------------------------------------|------------------------------------|
|                             |                           | <1/month                      | 1 to <4/month        | 1 to <3/week         | 3 to <5/week         | 5 to <7/week         | ≥1/day               |                      |                                              |                                    |
| Age < 60 years              | 3 520/<br>3 675 627       | 1.00<br>(Ref.)                | 0.96<br>(0.84, 1.10) | 0.96<br>(0.84, 1.10) | 0.94<br>(0.82, 1.09) | 0.92<br>(0.74, 1.13) | 0.87<br>(0.69, 1.10) | 0.26                 | 0.96<br>(0.85, 1.08)                         | 0.76                               |
| Age ≥ 60 years              | 11 286/<br>1 864 686      | 1.00<br>(Ref.)                | 1.02<br>(0.94, 1.11) | 1.03<br>(0.95, 1.12) | 0.97<br>(0.88, 1.06) | 1.11<br>(0.98, 1.26) | 0.99<br>(0.86, 1.14) | 0.73                 | 1.01<br>(0.94, 1.08)                         |                                    |
| BMI < 25 kg/m <sup>2</sup>  | 6 854/<br>2 914 229       | 1.00<br>(Ref.)                | 1.00<br>(0.90, 1.10) | 1.00<br>(0.90, 1.10) | 0.94<br>(0.84, 1.05) | 0.89<br>(0.75, 1.06) | 0.93<br>(0.77, 1.11) | 0.07                 | 0.99<br>(0.90, 1.08)                         | 0.10                               |
| BMI ≥ 25 kg/m <sup>2</sup>  | 7 952/<br>2 626 083       | 1.00<br>(Ref.)                | 0.97<br>(0.87, 1.07) | 0.95<br>(0.86, 1.05) | 0.91<br>(0.82, 1.02) | 1.09<br>(0.93, 1.26) | 0.93<br>(0.79, 1.11) | 0.87                 | 0.98<br>(0.90, 1.06)                         |                                    |
| < 15 MET-h/week             | 9 022/<br>3 114 238       | 1.00<br>(Ref.)                | 0.96<br>(0.88, 1.06) | 0.96<br>(0.87, 1.06) | 0.88<br>(0.79, 0.97) | 0.93<br>(0.80, 1.07) | 0.90<br>(0.77, 1.05) | 0.03                 | 0.94<br>(0.87, 1.02)                         | 0.25                               |
| ≥ 15 MET-h/week             | 5 784/<br>2 426 076       | 1.00<br>(Ref.)                | 0.99<br>(0.89, 1.10) | 0.99<br>(0.88, 1.10) | 1.01<br>(0.90, 1.14) | 1.16<br>(0.97, 1.39) | 0.98<br>(0.80, 1.20) | 0.30                 | 1.06<br>(0.95, 1.17)                         |                                    |
| Never smoker                | 6 109/<br>3 021 417       | 1.00<br>(Ref.)                | 1.05<br>(0.94, 1.18) | 1.07<br>(0.96, 1.20) | 1.03<br>(0.92, 1.17) | 1.15<br>(0.96, 1.37) | 0.99<br>(0.81, 1.21) | 0.86                 | 1.02<br>(0.92, 1.13)                         | 0.46                               |
| Ever smoker                 | 8 697/<br>2 518 896       | 1.00<br>(Ref.)                | 0.94<br>(0.85, 1.03) | 0.91<br>(0.83, 1.00) | 0.86<br>(0.78, 0.95) | 0.96<br>(0.83, 1.11) | 0.90<br>(0.77, 1.05) | 0.14                 | 0.97<br>(0.89, 1.05)                         |                                    |
| No hypertension             | 5 037/<br>3 733 397       | 1.00<br>(Ref.)                | 0.97<br>(0.86, 1.09) | 0.93<br>(0.83, 1.05) | 0.83<br>(0.74, 0.95) | 0.88<br>(0.74, 1.06) | 0.76<br>(0.62, 0.92) | 0.005                | 0.87<br>(0.78, 0.96)                         | 0.06                               |
| Hypertension                | 9 769/<br>1 806 917       | 1.00<br>(Ref.)                | 0.99<br>(0.90, 1.09) | 1.00<br>(0.91, 1.09) | 0.99<br>(0.89, 1.09) | 1.11<br>(0.96, 1.28) | 1.08<br>(0.92, 1.27) | 0.15                 | 1.07<br>(0.99, 1.16)                         |                                    |
| Normal blood<br>cholesterol | 6 578/<br>3 603 283       | 1.00<br>(Ref.)                | 0.97<br>(0.87, 1.09) | 1.02<br>(0.92, 1.14) | 0.97<br>(0.86, 1.09) | 1.03<br>(0.88, 1.20) | 0.98<br>(0.83, 1.16) | 0.95                 | 1.01<br>(0.94, 1.10)                         | 0.33                               |
| Hypercholesterolemia        | 8 228/<br>1 937 030       | 1.00<br>(Ref.)                | 0.99<br>(0.90, 1.09) | 0.95<br>(0.86, 1.04) | 0.91<br>(0.81, 1.01) | 1.05<br>(0.89, 1.24) | 0.91<br>(0.74, 1.10) | 0.19                 | 0.95<br>(0.86, 1.05)                         |                                    |
| No family history of<br>MI  | 10 164/<br>4 062 467      | 1.00<br>(Ref.)                | 1.00<br>(0.91, 1.09) | 0.98<br>(0.90, 1.07) | 0.93<br>(0.84, 1.02) | 0.99<br>(0.86, 1.13) | 0.94<br>(0.81, 1.09) | 0.14                 | 0.97<br>(0.90, 1.05)                         | 0.90                               |
| Family history of MI        | 4 642/<br>1 477 845       | 1.00<br>(Ref.)                | 0.94<br>(0.83, 1.06) | 0.94<br>(0.84, 1.06) | 0.89<br>(0.78, 1.02) | 1.03<br>(0.84, 1.25) | 0.90<br>(0.72, 1.13) | 0.58                 | 0.98<br>(0.87, 1.09)                         |                                    |
| No statin use               | 11 039/<br>4 839 377      | 1.00<br>(Ref.)                | 1.02<br>(0.94, 1.11) | 1.01<br>(0.93, 1.10) | 0.96<br>(0.88, 1.05) | 1.04<br>(0.92, 1.18) | 0.98<br>(0.86, 1.13) | 0.45                 | 1.00<br>(0.93, 1.07)                         | 0.54                               |

|                  |                      |                |                      |                      |                      |                      |                      |      |                      |         |
|------------------|----------------------|----------------|----------------------|----------------------|----------------------|----------------------|----------------------|------|----------------------|---------|
| Statin use       | 3 767/<br>700 937    | 1.00<br>(Ref.) | 0.88<br>(0.76, 1.01) | 0.89<br>(0.77, 1.02) | 0.85<br>(0.71, 1.00) | 1.07<br>(0.81, 1.41) | 0.73<br>(0.50, 1.07) | 0.53 | 0.91<br>(0.76, 1.09) |         |
| AHEI < median    | 6 796/<br>2 782 686  | 1.00<br>(Ref.) | 1.03<br>(0.91, 1.17) | 1.00<br>(0.89, 1.13) | 0.94<br>(0.83, 1.07) | 1.01<br>(0.86, 1.18) | 0.99<br>(0.84, 1.18) | 0.36 | 0.99<br>(0.92, 1.07) | 0.41    |
| AHEI > median    | 8 015/<br>2 757 627  | 1.00<br>(Ref.) | 0.94<br>(0.86, 1.03) | 0.96<br>(0.87, 1.04) | 0.92<br>(0.83, 1.02) | 1.05<br>(0.88, 1.24) | 0.84<br>(0.68, 1.04) | 0.49 | 0.96<br>(0.87, 1.06) |         |
| No T2D diagnosis | 12 913/<br>5 335 087 | 1.00<br>(Ref.) | 0.99<br>(0.92, 1.07) | 0.98<br>(0.91, 1.05) | 0.91<br>(0.84, 0.99) | 1.01<br>(0.89, 1.13) | 0.93<br>(0.81, 1.06) | 0.08 | 0.96<br>(0.90, 1.03) | <0.0001 |
| T2D diagnosis    | 2 989/<br>291 254    | 1.00<br>(Ref.) | 0.84<br>(0.69, 1.03) | 0.90<br>(0.74, 1.09) | 0.93<br>(0.76, 1.14) | 1.09<br>(0.85, 1.41) | 1.06<br>(0.81, 1.39) | 0.02 | 1.12<br>(0.98, 1.28) |         |

\*All results are stratified by calendar time (in 2-year intervals) and cohort, and adjusted for age (months), race (Caucasian, other), family history of myocardial infarction (yes, no), baseline hypercholesterolemia (yes, no), baseline hypertension (yes, no), smoking status (never, former, current), body mass index (kg/m<sup>2</sup>: categorical <21.0, 21.0-22.9, 23.0-24.9, 25.0-26.9, 27.0-29.9, 30.0-34.9, ≥35.0), physical activity (metabolic equivalent of task-hours/week: categorical <3.0, 3.0-8.9, 9.0-17.9, 18.0-26.9, ≥27.0), oral contraceptive use (never, former, current, in NHS II only), postmenopausal hormone use (premenopausal, never, former, current, in NHS and NHS II), alcohol intake (g/d in quintiles), and multivitamin use (yes, no). Model also included updated cumulative average of daily intake of total calories (kcal/d in quintiles), full-fat milk (servings/d in categories), bacon (servings/d in categories), red meat (servings/d in categories), other processed meats (servings/d in categories), refined grains (servings/d in categories), fruits (servings/d in categories), vegetables (servings/d in categories), potatoes (servings/d in categories), coffee (servings/d in categories), fruit juices (servings/d in categories), and sugar-sweetened beverages (servings/d in categories). All covariates (except race, family history of myocardial infarction, baseline hypercholesterolemia and hypertension) were updated every 2 years.

† *P* values for trend are based on continuous egg variable derived from the median egg intake in each category of consumption.

‡ *P* values for interaction are calculated using the likelihood ratio test.

AHEI: Alternate Healthy Eating Index; BMI: body mass index; CI: confidence interval; HR: hazard ratio; MET: metabolic equivalent of task; MI: myocardial infarction; T2D: type 2 diabetes.

**Supplemental Table 9:** Hazard ratios (95% confidence intervals) of incident cardiovascular disease according to categories of total egg consumption, including eggs in mixed foods.

| Cohort             | Frequency of Egg Consumption* |                   |                   |                   |                   |                   |                   | P value for trend <sup>†</sup> | HR (95% CI) per 1 egg per day increase |
|--------------------|-------------------------------|-------------------|-------------------|-------------------|-------------------|-------------------|-------------------|--------------------------------|----------------------------------------|
|                    | <1/month                      | 1 to <4/month     | 1 to <3/week      | 3 to <5/week      | 5 to <7/week      | 1 to <2/day       | ≥2/day            |                                |                                        |
| Cases/Person-years | 347/150 593                   | 2 559/1 144 369   | 6 982/2 571 039   | 3 627/1 312 426   | 708/208 813       | 462/125 307       | 121/27 766        |                                |                                        |
| NHS                | 1.00 (Ref.)                   | 0.88 (0.73, 1.07) | 0.85 (0.70, 1.02) | 0.80 (0.66, 0.97) | 0.78 (0.62, 0.97) | 0.85 (0.66, 1.08) | 0.86 (0.55, 1.34) | 0.08                           | 0.95 (0.85, 1.05)                      |
| NHSII              | 1.00 (Ref.)                   | 0.70 (0.50, 1.00) | 0.76 (0.54, 1.08) | 0.74 (0.50, 1.07) | 0.81 (0.49, 1.35) | 0.74 (0.38, 1.46) | 1.31 (0.31, 5.56) | 0.67                           | 0.95 (0.70, 1.29)                      |
| HPFS               | 1.00 (Ref.)                   | 1.10 (0.94, 1.29) | 1.09 (0.93, 1.27) | 1.12 (0.96, 1.32) | 1.20 (1.00, 1.44) | 1.06 (0.87, 1.28) | 1.02 (0.79, 1.32) | 0.92                           | 1.00 (0.94, 1.07)                      |
| Pooled Results     | 1.00 (Ref.)                   | 0.98 (0.87, 1.10) | 0.97 (0.86, 1.08) | 0.95 (0.84, 1.07) | 0.98 (0.86, 1.12) | 0.94 (0.81, 1.08) | 0.90 (0.73, 1.12) | 0.27                           | 0.98 (0.93, 1.03)                      |

\* All results are stratified by calendar time (in 2-year intervals) and cohort, and adjusted for age (months), race (Caucasian, other), family history of myocardial infarction (yes, no), baseline hypercholesterolemia (yes, no), baseline hypertension (yes, no), smoking status (never, former, current), body mass index (kg/m<sup>2</sup>: categorical <21.0, 21.0-22.9, 23.0-24.9, 25.0-26.9, 27.0-29.9, 30.0-34.9, ≥35.0), physical activity (metabolic equivalent of task-hours/week: categorical <3.0, 3.0-8.9, 9.0-17.9, 18.0-26.9, ≥27.0), oral contraceptive use (never, former, current, in NHS II only), postmenopausal hormone use (premenopausal, never, former, current, in NHS and NHS II), alcohol intake (g/d in quintiles), and multivitamin use (yes, no). Model also included updated cumulative average of daily intake of total calories (kcal/d in quintiles), full-fat milk (servings/d in categories), bacon (servings/d in categories), red meat (servings/d in categories), other processed meats (servings/d in categories), refined grains (servings/d in categories), fruits (servings/d in categories), vegetables (servings/d in categories), potatoes (servings/d in categories), coffee (servings/d in categories), fruit juices (servings/d in categories), and sugar-sweetened beverages (servings/d in categories). All covariates (except race, family history of myocardial infarction, baseline hypercholesterolemia and hypertension) were updated every 2 years.

<sup>†</sup> P values for trend are based on continuous egg variable derived from the median egg intake in each category of consumption.

HPFS: Health Professionals' Follow-Up Study; NHS: Nurses' Health Study.

**Supplemental Table 10:** Characteristics of studies included in the meta-analysis.

| Author, year            | Study Population                                 | Country       | Follow-up (y) | Sample size          | Age Range | Assessment of Diet                                                                                    | Ascertainment of Cases                                                                                                                                                                                                                           | Endpoints (No of cases) | Categories of Exposure                           | Relative Risks (95% CI)*                                                                             | Covariates in Multivariable Model                                                                                                                                                                                                                                             |
|-------------------------|--------------------------------------------------|---------------|---------------|----------------------|-----------|-------------------------------------------------------------------------------------------------------|--------------------------------------------------------------------------------------------------------------------------------------------------------------------------------------------------------------------------------------------------|-------------------------|--------------------------------------------------|------------------------------------------------------------------------------------------------------|-------------------------------------------------------------------------------------------------------------------------------------------------------------------------------------------------------------------------------------------------------------------------------|
| Abdollahi et al. 2019   | Kuopio Ischaemic Heart Disease Risk Factor Study | Finland       | 21.2          | 1 950 men            | 42-60 y   | Guided 4-day food records, baseline only                                                              | Computer linkage to the national hospital discharge and death certificate registers                                                                                                                                                              | Stroke (217)            | <15 g/d<br>15–26 g/d<br>27–45 g/d<br>>45 g/d     | 1.00 (reference)<br>1.01 (0.69,1.47)<br>1.10 (0.76,1.61)<br>0.81 (0.54,1.23)                         | Age, examination year, energy intake, smoking, BMI, leisure-time physical activity, use of hypertension medication, intakes of alcohol, fruits, berries, and vegetables                                                                                                       |
| Díez-Espino et al. 2017 | PREDIMED study                                   | Spain         | 5.8           | 7 216 men and women  | 55-80 y   | Interviewer-administered FFQ, every year (cumulative average), but HR calculated from baseline intake | Repeated contacts with participants, general practitioners who were responsible for the clinical care of the participants, yearly review of medical records, and consultation of the National Death Index                                        | CVD† (342)              | <2/wk<br>2-4/wk<br>>4/wk                         | 1.00 (reference)<br>0.95 (0.75, 1.19)<br>1.22 (0.72, 2.07)                                           | Age, sex, BMI and intervention group, recruitment center, smoking status, physical activity during leisure time, educational status, diabetes, hypertension, hypercholesterolemia, family history of CVD, Mediterranean food pattern, alcohol intake, and total energy intake |
| Djousse et al. 2008     | PHS (Physicians' Health Study)                   | United States | 20            | 21 327 men           | 40-86 y   | SFFQ, baseline, 24, 48, 72, 96, and 120 months after randomization                                    | Questionnaire were used to gather the information of the occurrence of new medical diagnoses including MI, stroke and confirmed by physicians or medical records, death certificates were obtained for confirmation and review of cause of death | CHD (1 550)             | <1/wk<br>1/wk<br>2-4/wk<br>5-6/wk<br>≥7/wk       | 1.00 (reference)<br>1.12 (0.96, 1.31)<br>1.16 (1.00, 1.36)<br>1.18 (0.93, 1.49)<br>0.90 (0.72, 1.14) | Age, BMI, smoking, history of hypertension, vitamin intake, alcohol, physical activity, breakfast cereal, vegetables, treatment arm, atrial fibrillation, diabetes, hypercholesterolemia, and premature myocardial infarction                                                 |
|                         |                                                  |               |               |                      |           |                                                                                                       |                                                                                                                                                                                                                                                  | Stroke (1 342)          | <1/wk<br>1/wk<br>2-4/wk<br>5-6/wk<br>≥7/wk       | 1.00 (reference)<br>0.96 (0.82, 1.13)<br>1.06 (0.91, 1.24)<br>1.13 (0.89, 1.42)<br>0.99 (0.80, 1.23) |                                                                                                                                                                                                                                                                               |
| Farvid et al. 2017      | Golestan Cohort Study                            | Iran          | 11            | 42 403 men and women | 36-85 y   | Interviewer-administered FFQ baseline only                                                            | Reported by family members, friends, or local health workers during annual telephone calls, and a physician visited the house to complete a validated verbal autopsy questionnaire by interviewing the next of kin                               | CVD death (1 467)       | 0.00/d<br>0.06/d<br>0.18/d<br>0.48/d<br>Per 3/wk | 1.00 (reference)<br>1.01 (0.87, 1.16)<br>0.93 (0.80, 1.08)<br>0.92 (0.79, 1.07)<br>0.92 (0.81, 1.05) | Gender, age, ethnicity, education, marital status, residency, smoking, opium use, alcohol, BMI, systolic blood pressure, occupational physical activity, family history of cancer, wealth score, medication, and energy intake                                                |
|                         |                                                  |               |               |                      |           |                                                                                                       |                                                                                                                                                                                                                                                  | CHD death (764)         | 0.00/d<br>0.06/d<br>0.18/d<br>0.48/d<br>Per 3/wk | 1.00 (reference)<br>1.03 (0.84, 1.26)<br>0.99 (0.80, 1.21)<br>0.92 (0.74, 1.14)<br>0.91 (0.77, 1.09) |                                                                                                                                                                                                                                                                               |
|                         |                                                  |               |               |                      |           |                                                                                                       |                                                                                                                                                                                                                                                  | Stroke death (507)      | 0.00/d<br>0.06/d<br>0.18/d<br>0.48/d<br>Per 3/wk | 1.00 (reference)<br>1.00 (0.79, 1.26)<br>0.80 (0.62, 1.04)<br>0.94 (0.73, 1.21)<br>0.94 (0.75, 1.17) |                                                                                                                                                                                                                                                                               |
|                         |                                                  |               |               |                      |           |                                                                                                       |                                                                                                                                                                                                                                                  |                         |                                                  |                                                                                                      |                                                                                                                                                                                                                                                                               |
| Goldberg et al. 2014    | Northern Manhattan Study                         | United States | 11            | 2 669 men and women  | >40 y     | Interviewer-administered                                                                              | Detected through ongoing hospital surveillance of                                                                                                                                                                                                | CVD (719)               | <1/mo<br>1/mo<br>2-3/mo                          | 1.00 (reference)<br>0.94 (0.75, 1.16)<br>0.85 (0.66, 1.09)                                           | Age, sex, race/ethnicity, BMI, diabetes, hypertension, LDL-C,                                                                                                                                                                                                                 |

|                     |                                                       |                |      |                                                           |         |                                         |                                                                                                                                                                                                                  |              |                                                          |                                                                                                                           |                                                                                                                                                                                                                                                                                                               |
|---------------------|-------------------------------------------------------|----------------|------|-----------------------------------------------------------|---------|-----------------------------------------|------------------------------------------------------------------------------------------------------------------------------------------------------------------------------------------------------------------|--------------|----------------------------------------------------------|---------------------------------------------------------------------------------------------------------------------------|---------------------------------------------------------------------------------------------------------------------------------------------------------------------------------------------------------------------------------------------------------------------------------------------------------------|
|                     |                                                       |                |      |                                                           |         | FFQ, baseline only                      | admission and discharge data from all area hospitals                                                                                                                                                             |              | 1/wk<br>≥2/wk<br>Per 1 egg/wk                            | 0.96 (0.79, 1.18)<br>1.03 (0.67, 1.60)<br>1.05 (0.95, 1.16)                                                               | HDL-C, TG, cholesterol lowering medication, moderate alcohol use,                                                                                                                                                                                                                                             |
|                     |                                                       |                |      |                                                           |         |                                         |                                                                                                                                                                                                                  | Stroke (266) | <1/mo<br>1/mo<br>2-3/mo<br>1/wk<br>≥2/wk<br>Per 1 egg/wk | 1.00 (reference)<br>0.97 (0.69, 1.37)<br>0.76 (0.50, 1.14)<br>0.83 (0.60, 1.16)<br>1.18 (0.60, 2.30)<br>1.04 (0.88, 1.22) | moderate-heavy physical activity, smoking, high-school completion, energy intake, Mediterranean diet score, family history of stroke in siblings, family history of MI in siblings,                                                                                                                           |
|                     |                                                       |                |      |                                                           |         |                                         |                                                                                                                                                                                                                  | CHD (226)    | <1/mo<br>1/mo<br>2-3/mo<br>1/wk<br>≥2/wk<br>Per 1 egg/wk | 1.00 (reference)<br>0.83 (0.57, 1.22)<br>0.66 (0.40, 1.06)<br>1.09 (0.77, 1.55)<br>0.81 (0.34, 1.93)<br>1.04 (0.87, 1.26) | consumption of saturated and unsaturated fats, carbohydrates, and proteins                                                                                                                                                                                                                                    |
| Guo et al. 2018     | CAPS                                                  | United Kingdom | 22.8 | 1 781 men                                                 | 45-59 y | SFFQ, updated every 5-years             | Hospital and general practitioner database, confirmed by two independent expert clinicians and an epidemiologist, including computed tomography, radiological and pathological information and National Registry | CVD (715)    | 0-1/wk<br>1-2/wk<br>2-3/wk<br>3-5/wk<br>≥5/wk            | 1.00 (reference)<br>0.98 (0.76, 1.26)<br>1.14 (0.89, 1.46)<br>1.01 (0.77, 1.33)<br>1.25 (0.94, 1.66)                      | Age, BMI, total energy intake, alcohol consumption, smoking, energy expenditure, social class, family history of myocardial infarction,                                                                                                                                                                       |
|                     |                                                       |                |      |                                                           |         |                                         |                                                                                                                                                                                                                  | Stroke (248) | 0-1/wk<br>1-2/wk<br>2-3/wk<br>3-5/wk<br>≥5/wk            | 1.00 (reference)<br>1.01 (0.65, 1.56)<br>1.00 (0.64, 1.55)<br>1.15 (0.72, 1.84)<br>1.60 (1.00, 2.57)                      | diabetes mellitus, sugar intake, fruit consumption, red meat consumption, and fiber intake                                                                                                                                                                                                                    |
|                     |                                                       |                |      |                                                           |         |                                         |                                                                                                                                                                                                                  | CHD (477)    | 0-1/wk<br>1-2/wk<br>2-3/wk<br>3-5/wk<br>≥5/wk            | 1.00 (reference)<br>0.97 (0.72, 1.31)<br>1.14 (0.85, 1.52)<br>1.01 (0.72, 1.4)<br>0.91 (0.64, 1.31)                       |                                                                                                                                                                                                                                                                                                               |
| Houston et al. 2011 | Health, Aging and Body Composition (Health ABC) Study | United States  | 9    | 1 600 men and women (without type 2 diabetes at baseline) | 70-79 y | Interviewer-administered FFQ, at year 2 | Annual in-person clinic exams, semi-annual phone interviews, medical record and death certificate                                                                                                                | CVD (158)    | <1/wk<br>1-2/wk<br>≥3/wk                                 | 1.00 (reference)<br>1.03 (0.71, 1.49)<br>1.38 (0.88, 2.16)                                                                | Age, sex, race, education, field center, smoking, alcohol use, physical activity, BMI, total energy intake, protein intake, fiber intake, multivitamin use, supplemental vitamin E use, statin use, aspirin use, prevalent hypertension, and saturated fatty acid intake                                      |
| Jang et al. 2018    | Korean Genome and Epidemiology Study                  | Korea          | 7.3  | 9 248 men and women                                       | 40-69 y | SFFQ, baseline and second follow-up     | Identified through biennial questionnaires, and all reported cases were confirmed by trained staff during personal interviews                                                                                    | CVD (570)    | 0.1/wk<br>0.7/wk<br>1.6/wk<br>4.2/wk                     | 1.00 (reference)<br>1.27 (0.99, 1.61)<br>1.23 (0.95, 1.60)<br>1.14 (0.87, 1.49)                                           | Age, sex, educational level, residential area, monthly household income, alcohol drinking, smoking in pack-years, physical activity level, dietary supplement use, history of hypertension and dyslipidemia, and intakes of total energy, total vegetables, total fruits, red meat, fiber, vitamin E, and BMI |

|                     |                            |                                                                                 |      |                       |         |                                              |                                                                                                                                                                                                                                                                     |                                     |                                                                                 |                                                                                                                       |                                                                                                                                                                                                                                                                                                                                                                                                                                                                                                        |
|---------------------|----------------------------|---------------------------------------------------------------------------------|------|-----------------------|---------|----------------------------------------------|---------------------------------------------------------------------------------------------------------------------------------------------------------------------------------------------------------------------------------------------------------------------|-------------------------------------|---------------------------------------------------------------------------------|-----------------------------------------------------------------------------------------------------------------------|--------------------------------------------------------------------------------------------------------------------------------------------------------------------------------------------------------------------------------------------------------------------------------------------------------------------------------------------------------------------------------------------------------------------------------------------------------------------------------------------------------|
| Key et al. 2019     | EPIC                       | Denmark, Norway, Sweden, France, Netherlands, UK, Greece, Italy, Spain, Germany | 12.6 | 409 885 men and women | 21-83 y | FFQ, baseline only                           | Record linkage to morbidity or hospital registries, and self-reports followed by confirmation with medical records; vital status collected from mortality registries at the regional or national level or by active follow-up of study participants and next of kin | CHD (7 198)                         | 4 g/d<br>9 g/d<br>15 g/d<br>22 g/d<br>40 g/d<br>Per 20 g/d                      | 1.00 (reference)<br>0.96 (0.89-1.04)<br>0.97 (0.90-1.05)<br>1.02 (0.94-1.09)<br>0.93 (0.86-1.01)<br>0.93 (0.88, 0.99) | Age, smoking status, number of cigarettes per day, history of diabetes, previous hypertension, prior hyperlipidemia, Cambridge physical activity index, employment status, level of education completed, BMI, current alcohol consumption, and intakes of energy, fruit and vegetables combined, sugars and fibre from cereals, sex, and EPIC centre;<br>Dose response analysis further adjusted for intakes of red and processed meat, poultry meat, white fish, fatty fish, milk, yogurt, and cheese |
| Larsson et al. 2015 | Cohort of Swedish Men      | Sweden                                                                          | 13   | 37 766 men            | 45-79 y | SFFQ, baseline only                          | Confirmed by Swedish National Patient and Cause of Death Registers                                                                                                                                                                                                  | CHD (3 262)                         | 0-3/mo<br>1-2/wk<br>3-6/wk<br>1.2/d                                             | 1.00 (reference)<br>0.98 (0.90, 1.05)<br>0.95 (0.84, 1.08)<br>1.03 (0.84, 1.27)                                       | Age, education, family history of CHD before 60 y of age, smoking status and pack-years of smoking, aspirin use, walking/cycling, exercise, BMI, history of hypertension, hypercholesterolemia, and diabetes, and intakes of total energy, alcohol, fruits and vegetables, and processed meat                                                                                                                                                                                                          |
|                     |                            |                                                                                 |      |                       |         |                                              | Ischemic stroke (2 039)                                                                                                                                                                                                                                             | 0-3/mo<br>1-2/wk<br>3-6/wk<br>1.2/d | 1.00 (reference)<br>0.91 (0.83, 1.00)<br>1.07 (0.92, 1.24)<br>0.87 (0.66, 1.14) |                                                                                                                       |                                                                                                                                                                                                                                                                                                                                                                                                                                                                                                        |
|                     |                            |                                                                                 |      |                       |         |                                              | Hemorrhagic stroke (405)                                                                                                                                                                                                                                            | 0-3/mo<br>1-2/wk<br>3-6/wk<br>1.2/d | 1.00 (reference)<br>0.91 (0.73, 1.14)<br>1.04 (0.74, 1.45)<br>1.05 (0.59, 1.88) |                                                                                                                       |                                                                                                                                                                                                                                                                                                                                                                                                                                                                                                        |
|                     | Swedish Mammography Cohort | Sweden                                                                          | 13   | 32 805 women          | 49-83 y | SFFQ, baseline only                          | Confirmed by Swedish National Patient and Cause of Death Registers                                                                                                                                                                                                  | CHD (1 504)                         | 0-3/mo<br>1-2/wk<br>3-6/wk<br>1.1/d                                             | 1.00 (reference)<br>0.94 (0.84, 1.05)<br>1.03 (0.86, 1.24)<br>0.85 (0.59, 1.23)                                       | Age, education, family history of CHD before 60 y of age, smoking status and pack-years of smoking, aspirin use, walking/cycling, exercise, BMI, history of hypertension, hypercholesterolemia, and diabetes, and intakes of total energy, alcohol, fruits and vegetables, and processed meat                                                                                                                                                                                                          |
|                     |                            |                                                                                 |      |                       |         |                                              | Ischemic stroke (1 561)                                                                                                                                                                                                                                             | 0-3/mo<br>1-2/wk<br>3-6/wk<br>1.1/d | 1.00 (reference)<br>1.06 (0.95, 1.19)<br>1.07 (0.90, 1.28)<br>1.06 (0.76, 1.47) |                                                                                                                       |                                                                                                                                                                                                                                                                                                                                                                                                                                                                                                        |
|                     |                            |                                                                                 |      |                       |         |                                              | Hemorrhagic stroke (294)                                                                                                                                                                                                                                            | 0-3/mo<br>1-2/wk<br>3-6/wk<br>1.1/d | 1.00 (ref)<br>1.06 (0.82, 1.36)<br>0.80 (0.52, 1.25)<br>0.96 (0.44, 2.12)       |                                                                                                                       |                                                                                                                                                                                                                                                                                                                                                                                                                                                                                                        |
| Mann et al. 1997    | Vegetarian Society         | UK                                                                              | 13.3 | 9 980 men and women   | 16-79 y | Self-administered SFFQ Baseline only         | Confirmed by the National Health Service Central Register                                                                                                                                                                                                           | CHD death (64)                      | <1/wk<br>1-5/wk<br>≥6/wk                                                        | 1.00 (reference)<br>1.28 (0.59, 2.79)<br>2.68 (1.19, 6.02)                                                            | Age, sex, smoking, and social class                                                                                                                                                                                                                                                                                                                                                                                                                                                                    |
| Misirli et al. 2012 | EPIC-Greece Cohort         | Greece                                                                          | 10.6 | 23 601 men and women  | NA      | Interviewer-administered SFFQ, baseline only | Self-reported and confirmed by pathology reports, medical records, discharge                                                                                                                                                                                        | Stroke (395)                        | Per 1 SD increment (11 g/d)                                                     | 1.07 (0.98, 1.18)                                                                                                     | Sex, BMI, age, education, smoking status, physical activity, diabetes, hypertension, energy intake                                                                                                                                                                                                                                                                                                                                                                                                     |



|                      |                                                    |                   |                   |                       |         |                                                                 | diagnoses, or death certificates                                                                                                                                                                         |                    |                   |                   |                                                                                                                                                                                                                                                                                                 |
|----------------------|----------------------------------------------------|-------------------|-------------------|-----------------------|---------|-----------------------------------------------------------------|----------------------------------------------------------------------------------------------------------------------------------------------------------------------------------------------------------|--------------------|-------------------|-------------------|-------------------------------------------------------------------------------------------------------------------------------------------------------------------------------------------------------------------------------------------------------------------------------------------------|
| Nakamura et al. 2004 | NIPPON DATA80                                      | Japan             | 14                | 4 077 men             | ≥30 y   | Self-administered FFQ baseline only                             | Confirmed by National Registry (computer matching of data from the National Vital Statistics)                                                                                                            | CVD death (39)     | 1/d               | 1.00 (reference)  | Age, serum creatinine, total cholesterol, blood glucose, BMI, systolic and diastolic BP, use of BP-lowering drugs, cigarette smoking, and alcohol intake                                                                                                                                        |
|                      |                                                    |                   |                   |                       |         |                                                                 |                                                                                                                                                                                                          | 0.5 d              | 1.49 (0.63, 3.48) |                   |                                                                                                                                                                                                                                                                                                 |
|                      |                                                    |                   |                   |                       |         |                                                                 |                                                                                                                                                                                                          | 1-2/wk             | 1.71 (0.78, 3.76) |                   |                                                                                                                                                                                                                                                                                                 |
|                      |                                                    |                   |                   |                       |         |                                                                 |                                                                                                                                                                                                          | Seldom             | 1.18 (0.26, 5.42) |                   |                                                                                                                                                                                                                                                                                                 |
|                      |                                                    |                   |                   |                       |         |                                                                 |                                                                                                                                                                                                          | Stroke death (112) | ≥2/d              | 0.25 (0.03, 1.81) |                                                                                                                                                                                                                                                                                                 |
|                      |                                                    |                   |                   |                       |         |                                                                 |                                                                                                                                                                                                          | 1/d                | 1.00 (reference)  |                   |                                                                                                                                                                                                                                                                                                 |
|                      |                                                    |                   |                   |                       |         |                                                                 |                                                                                                                                                                                                          | 0.5 d              | 1.10 (0.68, 1.76) |                   |                                                                                                                                                                                                                                                                                                 |
|                      |                                                    |                   |                   |                       |         |                                                                 |                                                                                                                                                                                                          | 1-2/wk             | 1.09 (0.69, 1.72) |                   |                                                                                                                                                                                                                                                                                                 |
|                      |                                                    |                   |                   |                       |         |                                                                 |                                                                                                                                                                                                          | Seldom             | 0.93 (0.36, 2.40) |                   |                                                                                                                                                                                                                                                                                                 |
|                      |                                                    |                   |                   | 5 186 women           | ≥30 y   | Self-administered FFQ baseline only                             | Confirmed by National Registry (computer matching of data from the National Vital Statistics)                                                                                                            | CVD death (41)     | ≥2/d              | 1.27 (0.16, 9.80) | Age, serum creatinine, total cholesterol, blood glucose, BMI, systolic and diastolic BP, use of BP-lowering drugs, cigarette smoking, and alcohol intake                                                                                                                                        |
|                      |                                                    |                   |                   |                       |         |                                                                 |                                                                                                                                                                                                          | 1/d                | 1.00 (reference)  |                   |                                                                                                                                                                                                                                                                                                 |
|                      |                                                    |                   |                   |                       |         |                                                                 |                                                                                                                                                                                                          | 0.5 d              | 0.78 (0.35, 1.82) |                   |                                                                                                                                                                                                                                                                                                 |
|                      |                                                    |                   |                   |                       |         |                                                                 |                                                                                                                                                                                                          | 1-2/wk             | 0.64 (0.28, 1.44) |                   |                                                                                                                                                                                                                                                                                                 |
|                      |                                                    |                   |                   |                       |         |                                                                 |                                                                                                                                                                                                          | Seldom             | 1.42 (0.56, 3.62) |                   |                                                                                                                                                                                                                                                                                                 |
|                      |                                                    |                   |                   |                       |         |                                                                 |                                                                                                                                                                                                          | Stroke death (107) | ≥2/d              | 1.22 (0.29, 5.17) |                                                                                                                                                                                                                                                                                                 |
|                      |                                                    |                   |                   |                       |         |                                                                 |                                                                                                                                                                                                          | 1/d                | 1.00 (reference)  |                   |                                                                                                                                                                                                                                                                                                 |
|                      |                                                    |                   |                   |                       |         |                                                                 |                                                                                                                                                                                                          | 1/2 d              | 1.46 (0.89, 2.40) |                   |                                                                                                                                                                                                                                                                                                 |
|                      |                                                    |                   |                   |                       |         |                                                                 |                                                                                                                                                                                                          | 1-2/wk             | 0.79 (0.47, 1.33) |                   |                                                                                                                                                                                                                                                                                                 |
|                      |                                                    |                   |                   |                       |         |                                                                 |                                                                                                                                                                                                          | Seldom             | 0.78 (0.35, 1.73) |                   |                                                                                                                                                                                                                                                                                                 |
| Nakamura et al. 2006 | Japan Public Health Center-based prospective study | Japan             | 10.2              | 90 735 men and women  | 40-69 y | Self-administered questionnaire, baseline only                  | Confirmed by medical records, letter, telephone or death certificate                                                                                                                                     | CVD (3 587)        | <1/wk             | 1.19 (0.86, 1.64) | Age, sex, BMI, hypertension, diabetes, use of cholesterol lowering drugs, smoking, alcohol drinking, whether participants intended to avoid cholesterol rich diets, consumption of meat, fish, vegetables, and fruits, and cohort effects                                                       |
|                      |                                                    |                   |                   |                       |         |                                                                 |                                                                                                                                                                                                          | 1-2/wk             | 1.00 (0.77, 1.3)  |                   |                                                                                                                                                                                                                                                                                                 |
|                      |                                                    |                   |                   |                       |         |                                                                 |                                                                                                                                                                                                          | 3-4/wk             | 1.00 (0.79, 1.26) |                   |                                                                                                                                                                                                                                                                                                 |
|                      |                                                    |                   |                   |                       |         |                                                                 |                                                                                                                                                                                                          | Almost daily       | 1.00 (reference)  |                   |                                                                                                                                                                                                                                                                                                 |
| Nakamura et al. 2018 | NIPPON DATA90                                      | Japan             | 15                | 4 686 women           | ≥30 y   | Self-administered questionnaire baseline only                   | Identified through the National Vital Statistics                                                                                                                                                         | CVD death (183)    | <1/week           | 1.09 (0.60, 1.97) | Age, BMI, BMixBMI, hypertension, diabetes, cigarette smoking, alcohol drinking, dyslipidemia therapy, intake of fiber, meat, and sodium                                                                                                                                                         |
|                      |                                                    |                   |                   |                       |         |                                                                 |                                                                                                                                                                                                          | 1-2/week           | 1.16 (0.81, 1.67) |                   |                                                                                                                                                                                                                                                                                                 |
|                      |                                                    |                   |                   |                       |         |                                                                 |                                                                                                                                                                                                          | 0.5/d              | 0.92 (0.61, 1.38) |                   |                                                                                                                                                                                                                                                                                                 |
|                      |                                                    |                   |                   |                       |         |                                                                 |                                                                                                                                                                                                          | 1/d                | 1.00 (reference)  |                   |                                                                                                                                                                                                                                                                                                 |
|                      |                                                    |                   |                   |                       |         |                                                                 |                                                                                                                                                                                                          | ≥2/day             | 1.24 (0.38, 4.10) |                   |                                                                                                                                                                                                                                                                                                 |
| Qin et al. 2018      | CKB                                                | China             | 8.9               | 461 213 men and women | 30-79 y | Interviewer-administered FFQ, baseline, second and third survey | Obtained regularly via local disease and death registries, checked against the national health insurance system with electronic linkage to all hospitalizations, or ascertained through active follow-up | CVD (83 977)       | 0.29/d            | 1.00 (reference)  | Age at recruitment, sex, education level, household income, marital status, alcohol consumption, tobacco smoking, physical activity in MET-hours/day, BMI, waist to hip ratio, prevalent hypertension, use of aspirin, family history of CVD, multivitamin supplementation, and dietary pattern |
|                      |                                                    |                   |                   |                       |         |                                                                 |                                                                                                                                                                                                          |                    | 0.36/d            | 0.97 (0.95, 1.00) |                                                                                                                                                                                                                                                                                                 |
|                      |                                                    |                   |                   |                       |         |                                                                 |                                                                                                                                                                                                          |                    | 0.46/d            | 0.92 (0.90, 0.94) |                                                                                                                                                                                                                                                                                                 |
|                      |                                                    |                   |                   |                       |         |                                                                 |                                                                                                                                                                                                          |                    | 0.56/d            | 0.90 (0.87, 0.93) |                                                                                                                                                                                                                                                                                                 |
|                      |                                                    |                   |                   |                       |         |                                                                 |                                                                                                                                                                                                          |                    | 0.76/d            | 0.89 (0.87, 0.92) |                                                                                                                                                                                                                                                                                                 |
|                      |                                                    |                   |                   |                       |         |                                                                 |                                                                                                                                                                                                          |                    | Per 1 egg/wk      | 0.97 (0.96, 0.98) |                                                                                                                                                                                                                                                                                                 |
|                      |                                                    |                   |                   |                       |         |                                                                 |                                                                                                                                                                                                          | CVD (30 169)       | 0.29/d            | 1.00 (reference)  |                                                                                                                                                                                                                                                                                                 |
|                      |                                                    |                   |                   |                       |         |                                                                 |                                                                                                                                                                                                          |                    | 0.36/d            | 0.95 (0.91, 0.99) |                                                                                                                                                                                                                                                                                                 |
|                      |                                                    |                   |                   |                       |         |                                                                 |                                                                                                                                                                                                          |                    | 0.46/d            | 0.92 (0.88, 0.96) |                                                                                                                                                                                                                                                                                                 |
|                      |                                                    |                   |                   |                       |         |                                                                 |                                                                                                                                                                                                          |                    | 0.56/d            | 0.86 (0.81, 0.91) |                                                                                                                                                                                                                                                                                                 |
|                      | 0.76/d                                             | 0.88 (0.84, 0.93) |                   |                       |         |                                                                 |                                                                                                                                                                                                          |                    |                   |                   |                                                                                                                                                                                                                                                                                                 |
|                      | Per 1 egg/wk                                       | 0.97 (0.95, 0.98) |                   |                       |         |                                                                 |                                                                                                                                                                                                          |                    |                   |                   |                                                                                                                                                                                                                                                                                                 |
|                      | Hemorrhagic stroke (7 078)                         | 0.29/d            | 1.00 (reference)  |                       |         |                                                                 |                                                                                                                                                                                                          |                    |                   |                   |                                                                                                                                                                                                                                                                                                 |
|                      |                                                    | 0.36/d            | 0.86 (0.79, 0.93) |                       |         |                                                                 |                                                                                                                                                                                                          |                    |                   |                   |                                                                                                                                                                                                                                                                                                 |
|                      |                                                    | 0.46/d            | 0.82 (0.76, 0.88) |                       |         |                                                                 |                                                                                                                                                                                                          |                    |                   |                   |                                                                                                                                                                                                                                                                                                 |
|                      |                                                    | 0.56/d            | 0.77 (0.70, 0.86) |                       |         |                                                                 |                                                                                                                                                                                                          |                    |                   |                   |                                                                                                                                                                                                                                                                                                 |
|                      |                                                    | 0.76/d            | 0.74 (0.67, 0.82) |                       |         |                                                                 |                                                                                                                                                                                                          |                    |                   |                   |                                                                                                                                                                                                                                                                                                 |

|                            |                                                  |               |                   |                       |                   |                                                            |                                                                                     | Per 1 egg/wk      | 0.92 (0.90, 0.95) |                   |                                                                                                                                                                                                                                                                                                                                                                           |
|----------------------------|--------------------------------------------------|---------------|-------------------|-----------------------|-------------------|------------------------------------------------------------|-------------------------------------------------------------------------------------|-------------------|-------------------|-------------------|---------------------------------------------------------------------------------------------------------------------------------------------------------------------------------------------------------------------------------------------------------------------------------------------------------------------------------------------------------------------------|
| Qureshi et al. 2007        | NHANES-I                                         | United States | 20                | 9 734 men and women   | 25-74 y           | Self-administered nutritional questionnaire, baseline only | Confirmed by medical records or death certificate                                   | Stroke (655)      | 0.29/d            | 1.00 (reference)  | Age, sex, race/ethnicity, systolic blood pressure, diabetes, serum cholesterol, smoking, BMI, education                                                                                                                                                                                                                                                                   |
|                            |                                                  |               |                   |                       |                   |                                                            |                                                                                     | (27 745)          | 0.36/d            | 0.98 (0.94, 1.03) |                                                                                                                                                                                                                                                                                                                                                                           |
|                            |                                                  |               |                   |                       |                   |                                                            |                                                                                     |                   | 0.46/d            | 0.95 (0.91, 1.00) |                                                                                                                                                                                                                                                                                                                                                                           |
|                            |                                                  |               |                   |                       |                   |                                                            |                                                                                     |                   | 0.56/d            | 0.95 (0.90, 1.00) |                                                                                                                                                                                                                                                                                                                                                                           |
|                            |                                                  |               |                   |                       |                   |                                                            |                                                                                     |                   | 0.76/d            | 0.90 (0.85, 0.95) |                                                                                                                                                                                                                                                                                                                                                                           |
|                            |                                                  |               |                   |                       |                   |                                                            |                                                                                     |                   | Per 1 egg/wk      | 0.97 (0.96, 0.98) |                                                                                                                                                                                                                                                                                                                                                                           |
| Sauvaget et al. 2003       | Life Span Study                                  | Japan         | 16                | 37 130 men and women  | 34-103 y          | Self-administered FFQ baseline only                        | Confirmed by the nationwide family registration system of Japan                     | Stroke (591)      | <1/wk             | 1.00 (reference)  | Sex and birth cohort, and adjusted for city, radiation dose, self-reported body mass index, smoking status, alcohol habits, education level, history of diabetes, or hypertension.                                                                                                                                                                                        |
|                            |                                                  |               |                   |                       |                   |                                                            |                                                                                     |                   | 1-6/wk            | 0.90 (0.70, 1.00) |                                                                                                                                                                                                                                                                                                                                                                           |
|                            |                                                  |               |                   |                       |                   |                                                            |                                                                                     |                   | >6/wk             | 0.90 (0.70, 1.10) |                                                                                                                                                                                                                                                                                                                                                                           |
|                            |                                                  |               |                   |                       |                   |                                                            |                                                                                     | CHD (1 584)       | <1/wk             | 1.00 (reference)  |                                                                                                                                                                                                                                                                                                                                                                           |
|                            |                                                  |               |                   |                       |                   |                                                            |                                                                                     |                   | 1-6/wk            | 1.00 (0.90, 1.10) |                                                                                                                                                                                                                                                                                                                                                                           |
|                            |                                                  |               |                   |                       |                   |                                                            |                                                                                     |                   | >6/wk             | 1.10 (0.90, 1.30) |                                                                                                                                                                                                                                                                                                                                                                           |
| Scrafford et al. 2011      | NHANES III                                       | United States | 8.8               | 6 833 men             | >17 y             | Self-administered FFQ baseline only                        | Linking death records from National Death Index                                     | CHD death (198)   | 0.27/wk           | 1.00 (reference)  | Age, energy, marital status, education status, race-ethnicity, BMI, diabetes, hypertension, and alcohol intake                                                                                                                                                                                                                                                            |
|                            |                                                  |               |                   |                       |                   |                                                            |                                                                                     |                   | 1.93/wk           | 1.26 (0.79, 2.00) |                                                                                                                                                                                                                                                                                                                                                                           |
|                            |                                                  |               |                   |                       |                   |                                                            |                                                                                     |                   | 7.54/wk           | 1.13 (0.61, 2.11) |                                                                                                                                                                                                                                                                                                                                                                           |
|                            |                                                  |               | Stroke death (63) | 0.27/wk               | 1.00 (reference)  |                                                            |                                                                                     |                   |                   |                   |                                                                                                                                                                                                                                                                                                                                                                           |
|                            |                                                  |               |                   | 1.93/wk               | 1.00 (0.49, 2.02) |                                                            |                                                                                     |                   |                   |                   |                                                                                                                                                                                                                                                                                                                                                                           |
|                            |                                                  |               |                   | 7.54/wk               | 0.27 (0.10, 0.73) |                                                            |                                                                                     |                   |                   |                   |                                                                                                                                                                                                                                                                                                                                                                           |
| van den Brandt et al. 2019 | NLCS                                             | Netherlands   | 10                | 120 852 men and women | 55-69 y           | Self-administered FFQ baseline only                        | Death certificates linkage to statistics Netherlands                                | CVD Death (2 985) | 0 g/day           | 1.00 (reference)  | age at baseline, sex, cigarette smoking status, number of cigarettes smoked per day, and years of smoking, history of physician-diagnosed hypertension and diabetes, body height, BMI, non-occupational physical activity, highest level of education, intake of alcohol, vegetables and fruit, energy, use of nutritional supplements, and, in women, postmenopausal HRT |
|                            |                                                  |               |                   |                       |                   |                                                            |                                                                                     |                   | 7.1 g/day         | 0.89 (0.69, 1.16) |                                                                                                                                                                                                                                                                                                                                                                           |
|                            |                                                  |               |                   |                       |                   |                                                            |                                                                                     |                   | 14.2 g/day        | 0.90 (0.70, 1.16) |                                                                                                                                                                                                                                                                                                                                                                           |
|                            |                                                  |               |                   | 21.4 g/day            | 0.92 (0.71, 1.19) |                                                            |                                                                                     |                   |                   |                   |                                                                                                                                                                                                                                                                                                                                                                           |
|                            |                                                  |               |                   | Per 50g/day           | 0.92 (0.70, 1.20) |                                                            |                                                                                     |                   |                   |                   |                                                                                                                                                                                                                                                                                                                                                                           |
|                            |                                                  |               |                   |                       |                   |                                                            |                                                                                     |                   |                   |                   |                                                                                                                                                                                                                                                                                                                                                                           |
| Virtanen et al. 2016       | Kuopio Ischaemic Heart Disease Risk Factor Study | Finland       | 20.8              | 1 032 men             | 42-60 y           | Guided 4-day food records, baseline only                   | Computer linkage to the national hospital discharge and death certificate registers | CHD (230)         | 11 g/d            | 1.00 (reference)  | Age, examination year, energy intake, smoking, BMI, diabetes, hypertension, leisure-time                                                                                                                                                                                                                                                                                  |
|                            |                                                  |               |                   |                       |                   |                                                            |                                                                                     |                   | 26 g/d            | 0.96 (0.69, 1.34) |                                                                                                                                                                                                                                                                                                                                                                           |
|                            |                                                  |               |                   |                       |                   |                                                            |                                                                                     |                   | 52 g/d            | 1.18 (0.85, 1.66) |                                                                                                                                                                                                                                                                                                                                                                           |

|                      |                                |               |     |                      |         |                                                                      |                                                                                                 |                         |                                                        |                                                                                                      |                                                                                                                                                                                                                                                                                                                                                                                                                   |
|----------------------|--------------------------------|---------------|-----|----------------------|---------|----------------------------------------------------------------------|-------------------------------------------------------------------------------------------------|-------------------------|--------------------------------------------------------|------------------------------------------------------------------------------------------------------|-------------------------------------------------------------------------------------------------------------------------------------------------------------------------------------------------------------------------------------------------------------------------------------------------------------------------------------------------------------------------------------------------------------------|
|                      |                                |               |     |                      |         |                                                                      |                                                                                                 |                         |                                                        |                                                                                                      | physical activity, coronary artery disease history in close relatives, education, and intakes of alcohol, fruits, berries, vegetables, fiber, polyunsaturated fatty acids, and saturated fatty acids                                                                                                                                                                                                              |
| Wang et al. 2016     | Linxian NIT                    | China         | 26  | 2 445 men and women  | 40-69 y | Interviewer-administered FFQ baseline only                           | Doctor visits/ Hospital records reviews/ National registry                                      | CHD death (355)         | Per 4 times/month                                      | 1.00 (0.95, 1.06)                                                                                    | Age, sex, commune, smoking, drinking, season and BMI                                                                                                                                                                                                                                                                                                                                                              |
|                      |                                |               |     |                      |         |                                                                      |                                                                                                 | Stroke death (452)      | Per 4 times/month                                      | 1.00 (0.96, 1.06)                                                                                    |                                                                                                                                                                                                                                                                                                                                                                                                                   |
| Xu et al. 2018       | Guangzhou Biobank Cohort Study | China         | 9.8 | 28 024 men and women | ≥50 y   | FFQ baseline only                                                    | Obtained via record linkage with the Guangzhou Center for Disease Control and Prevention (GCDC) | CVD death (873)         | <1/week<br>1-2/week<br>3-4/week<br>5-6/week<br>≥7/week | 1.00 (reference)<br>0.92 (0.77, 1.10)<br>0.96 (0.80, 1.14)<br>0.81 (0.58, 1.14)<br>0.99 (0.76, 1.27) | Sex, age, education, occupation, family income, smoking status, physical activity, alcohol drinking, self-rated health and chronic disease history (diabetes, hypertension and dyslipidemia)                                                                                                                                                                                                                      |
|                      |                                |               |     |                      |         |                                                                      |                                                                                                 | CHD death (388)         | <1/week<br>1-2/week<br>3-4/week<br>5-6/week<br>≥7/week | 1.00 (reference)<br>0.86 (0.66, 1.13)<br>1.03 (0.79, 1.34)<br>0.75 (0.44, 1.27)<br>0.92 (0.63, 1.36) |                                                                                                                                                                                                                                                                                                                                                                                                                   |
|                      |                                |               |     |                      |         |                                                                      |                                                                                                 | Stroke death (341)      | <1/week<br>1-2/week<br>3-4/week<br>5-6/week<br>≥7/week | 1.00 (reference)<br>0.99 (0.75, 1.30)<br>0.90 (0.68, 1.20)<br>0.81 (0.47, 1.38)<br>0.88 (0.57, 1.35) |                                                                                                                                                                                                                                                                                                                                                                                                                   |
| Yaemsiri et al. 2012 | WHI-OS                         | United States | 7.6 | 87 025 women         | 50-79 y | Self-administered FFQ, baseline and at follow-up visit 3 years later | Self-report during annual medical history; medical charts, brain imaging, or death certificates | Ischemic stroke (1 049) | Per 1 medium serving/d                                 | 0.86 (0.55, 1.33)                                                                                    | Age, race, education, family income, years as a regular smoker, hormone replacement therapy use, total MET-hours per week, alcohol intake, history of CHD, history of atrial fibrillation, history of diabetes, aspirin use, use of antihypertensive medication, use of cholesterol-lowering medication, BMI, systolic blood pressure, intakes of total energy, dietary vitamin E, fruits, vegetables, and fibers |
| Zazpe et al. 2011    | The SUN Project                | Spain         | 5.8 | 14 185 men and women | 20-90 y | Self-administered questionnaire, baseline only                       | Self-reported questionnaire and confirmed by medical record                                     | CVD (91)                | <1/wk<br>1/wk<br>2-4/wk<br>>4/wk                       | 1.00 (reference)<br>0.78 (0.36, 1.70)<br>1.00 (0.51, 1.97)<br>1.10 (0.46, 2.63)                      | Age, sex, total energy intake, adherence to the Mediterranean food pattern, alcohol intake, BMI, smoking status, physical activity, family history of CVD, diabetes, hypertension, and hypercholesterolemia                                                                                                                                                                                                       |

|                                  |                                                                                  |               |      |                      |         |                                       |                                                                                                 |                                                                          |                                                                                                                                                |                                                                                                                                                |                                                                                                                                                                                                                                                                                                                                                                                                                                  |
|----------------------------------|----------------------------------------------------------------------------------|---------------|------|----------------------|---------|---------------------------------------|-------------------------------------------------------------------------------------------------|--------------------------------------------------------------------------|------------------------------------------------------------------------------------------------------------------------------------------------|------------------------------------------------------------------------------------------------------------------------------------------------|----------------------------------------------------------------------------------------------------------------------------------------------------------------------------------------------------------------------------------------------------------------------------------------------------------------------------------------------------------------------------------------------------------------------------------|
| Zhong et al. 2019                | The Lifetime Risk Pooling Project, 6 cohorts (ARIC, CARDIA, FHS, FOS, JHS, MESA) | United States | 17.5 | 29 615 men and women | NA      | FFQs, baseline only                   | Adjudicated cause of death by review of medical records and/or autopsies by study investigators | CVD (5 400)                                                              | 0/d<br><0.5/d<br>0.5-1/d<br>1-2/d<br>≥2/d                                                                                                      | 1.00 (reference)<br>1.06 (0.98, 1.14)<br>1.05 (0.92, 1.20)<br>1.17 (1.04, 1.31)<br>1.29 (1.04, 1.59)                                           | Age, sex, race/ethnicity, education, total energy, smoking status, smoking pack-years, cohort-specific physical activity z- score, alcohol consumption, and use of hormone replacement therapy, BMI, diabetes status, systolic blood pressure, use of anti-hypertensive medications, high density lipoprotein cholesterol, non-HDL-C, and use of lipid-lowering medications                                                      |
|                                  |                                                                                  |               |      |                      |         |                                       | CHD (2 088)                                                                                     | Per 0.5/d                                                                | 1.07 (1.01, 1.12)                                                                                                                              |                                                                                                                                                |                                                                                                                                                                                                                                                                                                                                                                                                                                  |
|                                  |                                                                                  |               |      |                      |         |                                       | Stroke (1 302)                                                                                  | Per 0.5/d                                                                | 1.10 (1.03, 1.18)                                                                                                                              |                                                                                                                                                |                                                                                                                                                                                                                                                                                                                                                                                                                                  |
| Drouin-Chartier et al. (current) | NHS                                                                              | United States | 32   | 83 349 women         | 30-55 y | Self-administered SFFQ, every 4 years | Self-report with or without validation with medical records                                     | CVD (7 411)                                                              | <1/mo<br>1-<4/mo<br>1-<3/wk<br>3-<5/wk<br>5-<7/wk<br>≥1/d<br>Per 1 egg/d                                                                       | 1.00 (reference)<br>1.01 (0.89, 1.14)<br>0.96 (0.84, 1.08)<br>0.91 (0.79, 1.03)<br>0.90 (0.75, 1.07)<br>0.93 (0.77, 1.14)<br>0.94 (0.85, 1.04) | Age, calendar time, smoking status, BMI, physical activity, postmenopausal hormone use, race, family history of myocardial infarction, baseline high blood cholesterol, baseline high blood pressure, alcohol intake, multivitamin use, daily intake of total calories, full-fat milk, bacon, red meat, other processed meats, refined grains, fruits, vegetables, potatoes, coffee, fruit juices, and sugar-sweetened beverages |
|                                  |                                                                                  |               |      |                      |         |                                       | CHD (3 896)                                                                                     | <1/mo<br>1-<4/mo<br>1-<3/wk<br>3-<5/wk<br>5-<7/wk<br>≥1/d<br>Per 1 egg/d | 1.00 (reference)<br>0.94 (0.79, 1.12)<br>0.89 (0.76, 1.05)<br>0.85 (0.71, 1.01)<br>0.88 (0.69, 1.11)<br>0.85 (0.65, 1.11)<br>0.92 (0.80, 1.05) |                                                                                                                                                |                                                                                                                                                                                                                                                                                                                                                                                                                                  |
|                                  |                                                                                  |               |      |                      |         |                                       | Stroke (3 587)                                                                                  | <1/mo<br>1-<4/mo<br>1-<3/wk<br>3-<5/wk<br>5-<7/wk<br>≥1/d<br>Per 1 egg/d | 1.00 (reference)<br>1.09 (0.90, 1.31)<br>1.03 (0.86, 1.24)<br>0.97 (0.79, 1.17)<br>0.91 (0.69, 1.20)<br>1.04 (0.77, 1.40)<br>0.96 (0.83, 1.12) |                                                                                                                                                |                                                                                                                                                                                                                                                                                                                                                                                                                                  |
|                                  | NHS II                                                                           | United States | 22   | 90 214 women         | 25-44 y | Self-administered SFFQ, every 4 years | Self-report with or without validation with medical records                                     | CVD (1 225)                                                              | <1/mo<br>1-<4/mo<br>1-<3/wk<br>3-<5/wk<br>5-<7/wk<br>≥1/d<br>Per 1 egg/d                                                                       | 1.00 (reference)<br>0.84 (0.69, 1.03)<br>0.95 (0.77, 1.17)<br>0.76 (0.59, 0.99)<br>1.32 (0.86, 2.02)<br>0.61 (0.28, 1.31)<br>0.97 (0.71, 1.33) |                                                                                                                                                                                                                                                                                                                                                                                                                                  |
|                                  |                                                                                  |               |      |                      |         |                                       | CHD (653)                                                                                       | <1/mo<br>1-<4/mo<br>1-<3/wk<br>3-<5/wk<br>5-<7/wk<br>≥1/d<br>Per 1 egg/d | 1.00 (reference)<br>0.77 (0.59, 1.01)<br>0.86 (0.65, 1.14)<br>0.56 (0.39, 0.81)<br>1.31 (0.75, 2.27)<br>0.43 (0.13, 1.38)<br>0.91 (0.59, 1.42) |                                                                                                                                                |                                                                                                                                                                                                                                                                                                                                                                                                                                  |
|                                  |                                                                                  |               |      |                      |         |                                       | Stroke (576)                                                                                    | <1/mo<br>1-<4/mo<br>1-<3/wk<br>3-<5/wk<br>5-<7/wk                        | 1.00 (reference)<br>0.91 (0.67, 1.22)<br>1.03 (0.76, 1.40)<br>1.03 (0.71, 1.50)<br>1.33 (0.68, 2.59)                                           |                                                                                                                                                |                                                                                                                                                                                                                                                                                                                                                                                                                                  |

|                                                       |                                                       |               |            |                                          |                                       |                                                                                                       |                                                                                                                                                                                                           |             |                   |                    |                                                                                                                                                                                                                                                                                               |
|-------------------------------------------------------|-------------------------------------------------------|---------------|------------|------------------------------------------|---------------------------------------|-------------------------------------------------------------------------------------------------------|-----------------------------------------------------------------------------------------------------------------------------------------------------------------------------------------------------------|-------------|-------------------|--------------------|-----------------------------------------------------------------------------------------------------------------------------------------------------------------------------------------------------------------------------------------------------------------------------------------------|
|                                                       |                                                       |               |            |                                          |                                       |                                                                                                       |                                                                                                                                                                                                           |             | ≥1/d              | 0.86 (0.31, 2.42)  |                                                                                                                                                                                                                                                                                               |
|                                                       |                                                       |               |            |                                          |                                       |                                                                                                       |                                                                                                                                                                                                           |             | Per 1 egg/d       | 1.08 (0.69, 1.68)  |                                                                                                                                                                                                                                                                                               |
| HPFS                                                  | United States                                         | 26            | 42 055 men | 40-75 y                                  | Self-administered SFFQ, every 4 years | Self-report with or without validation with medical records                                           | CVD (6 170)                                                                                                                                                                                               | <1/mo       | 1.00 (reference)  |                    | Age, calendar time, smoking status, BMI, physical activity, family history of myocardial infarction, baseline high blood cholesterol, baseline high blood pressure,                                                                                                                           |
|                                                       |                                                       |               |            |                                          |                                       |                                                                                                       |                                                                                                                                                                                                           | 1-<4/mo     | 0.99 (0.90, 1.09) |                    | alcohol intake,                                                                                                                                                                                                                                                                               |
|                                                       |                                                       |               |            |                                          |                                       |                                                                                                       |                                                                                                                                                                                                           | 1-<3/wk     | 1.01 (0.92, 1.11) |                    | multivitamin use, daily intake of total calories,                                                                                                                                                                                                                                             |
|                                                       |                                                       |               |            |                                          |                                       |                                                                                                       |                                                                                                                                                                                                           | 3-<5/wk     | 0.98 (0.88, 1.09) |                    | full-fat milk, bacon, red meat, other processed meats, refined grains,                                                                                                                                                                                                                        |
|                                                       |                                                       |               |            |                                          |                                       |                                                                                                       |                                                                                                                                                                                                           | 5-<7/wk     | 1.13 (0.97, 1.32) |                    | fruits, vegetables, potatoes,                                                                                                                                                                                                                                                                 |
|                                                       |                                                       |               |            |                                          |                                       |                                                                                                       |                                                                                                                                                                                                           | ≥1/d        | 0.97 (0.82, 1.14) |                    | coffee, fruit juices, and sugar-sweetened beverages                                                                                                                                                                                                                                           |
|                                                       |                                                       |               |            |                                          |                                       |                                                                                                       |                                                                                                                                                                                                           | Per 1 egg/d | 1.01 (0.93, 1.10) |                    |                                                                                                                                                                                                                                                                                               |
|                                                       |                                                       |               |            |                                          |                                       |                                                                                                       | CHD (4 461)                                                                                                                                                                                               | <1/mo       | 1.00 (reference)  |                    |                                                                                                                                                                                                                                                                                               |
|                                                       |                                                       |               |            |                                          |                                       |                                                                                                       |                                                                                                                                                                                                           | 1-<4/mo     | 1.00 (0.89, 1.12) |                    |                                                                                                                                                                                                                                                                                               |
|                                                       |                                                       |               |            |                                          |                                       |                                                                                                       |                                                                                                                                                                                                           | 1-<3/wk     | 1.02 (0.91, 1.14) |                    |                                                                                                                                                                                                                                                                                               |
|                                                       |                                                       |               |            |                                          |                                       |                                                                                                       |                                                                                                                                                                                                           | 3-<5/wk     | 1.01 (0.89, 1.14) |                    |                                                                                                                                                                                                                                                                                               |
|                                                       |                                                       |               |            |                                          |                                       |                                                                                                       |                                                                                                                                                                                                           | 5-<7/wk     | 1.09 (0.91, 1.31) |                    |                                                                                                                                                                                                                                                                                               |
|                                                       |                                                       |               |            |                                          |                                       |                                                                                                       |                                                                                                                                                                                                           | ≥1/d        | 0.99 (0.82, 1.20) |                    |                                                                                                                                                                                                                                                                                               |
|                                                       |                                                       |               |            |                                          |                                       |                                                                                                       |                                                                                                                                                                                                           | Per 1 egg/d | 1.00 (0.91, 1.10) |                    |                                                                                                                                                                                                                                                                                               |
|                                                       |                                                       |               |            |                                          |                                       |                                                                                                       | Stroke (1 740)                                                                                                                                                                                            | <1/mo       | 1.00 (reference)  |                    |                                                                                                                                                                                                                                                                                               |
|                                                       |                                                       |               |            |                                          |                                       |                                                                                                       |                                                                                                                                                                                                           | 1-<4/mo     | 0.95 (0.79, 1.15) |                    |                                                                                                                                                                                                                                                                                               |
|                                                       |                                                       |               |            |                                          |                                       |                                                                                                       |                                                                                                                                                                                                           | 1-<3/wk     | 0.98 (0.82, 1.18) |                    |                                                                                                                                                                                                                                                                                               |
|                                                       |                                                       |               |            |                                          |                                       |                                                                                                       |                                                                                                                                                                                                           | 3-<5/wk     | 0.90 (0.74, 1.11) |                    |                                                                                                                                                                                                                                                                                               |
|                                                       |                                                       |               |            |                                          |                                       |                                                                                                       |                                                                                                                                                                                                           | 5-<7/wk     | 1.24 (0.93, 1.66) |                    |                                                                                                                                                                                                                                                                                               |
|                                                       |                                                       |               |            |                                          |                                       |                                                                                                       |                                                                                                                                                                                                           | ≥1/d        | 0.97 (0.71, 1.33) |                    |                                                                                                                                                                                                                                                                                               |
|                                                       |                                                       |               |            |                                          |                                       |                                                                                                       |                                                                                                                                                                                                           | Per 1 egg/d | 1.07 (0.92, 1.24) |                    |                                                                                                                                                                                                                                                                                               |
| <b>Studies among individuals with type 2 diabetes</b> |                                                       |               |            |                                          |                                       |                                                                                                       |                                                                                                                                                                                                           |             |                   |                    |                                                                                                                                                                                                                                                                                               |
| Díez-Espino et al. 2017                               | PREDIMED study                                        | Spain         | 5.8        | 3 527 men and women with type 2 diabetes | 55-80 y                               | Interviewer-administered FFQ, every year (cumulative average), but HR calculated from baseline intake | Repeated contacts with participants, general practitioners who were responsible for the clinical care of the participants, yearly review of medical records, and consultation of the National Death Index | CVD (225)   | <2/wk             | 1.00 (reference)   | Age, sex, BMI, intervention group, recruitment center, smoking status, physical activity during leisure time, educational status, diabetes, hypertension, hypercholesterolemia, family history of CVD, Mediterranean food pattern, alcohol intake, and total energy intake                    |
|                                                       |                                                       |               |            |                                          |                                       |                                                                                                       |                                                                                                                                                                                                           |             | 2-4/wk            | 0.86 (0.65, 1.14)  |                                                                                                                                                                                                                                                                                               |
|                                                       |                                                       |               |            |                                          |                                       |                                                                                                       |                                                                                                                                                                                                           |             | >4/wk             | 1.33 (0.72, 2.46)  |                                                                                                                                                                                                                                                                                               |
| Houston et al. 2011‡                                  | Health, Aging and Body Composition (Health ABC) Study | United States | 9          | 341 men and women with type 2 diabetes   | 70-79 y                               | Interviewer-administered FFQ, at year 2                                                               | Annual in-person clinic exams, semi-annual phone interviews, medical record and death certificate                                                                                                         | CVD (45)    | <1/wk             | 1.00 (reference)   | Age, sex, race, education, field center, smoking, alcohol use, physical activity, BMI, total energy intake, protein intake, fiber intake, multivitamin use, supplemental vitamin E use, statin use, aspirin use, oral estrogen use (women), prevalent hypertension, and saturated fatty acids |
|                                                       |                                                       |               |            |                                          |                                       |                                                                                                       |                                                                                                                                                                                                           |             | 1-2/wk            | 3.33 (1.18, 9.41)  |                                                                                                                                                                                                                                                                                               |
|                                                       |                                                       |               |            |                                          |                                       |                                                                                                       |                                                                                                                                                                                                           |             | ≥3/wk             | 5.02 (1.63, 15.52) |                                                                                                                                                                                                                                                                                               |
| Jang et al. 2018                                      | Korean Genome and Epidemiology Study                  | Korea         | 7.3        | 615 men and women with type 2 diabetes   | 40-69 y                               | SFFQ, baseline and second follow-up                                                                   | Identified through biennial questionnaires, and all reported cases were confirmed by trained staff during personal interviews                                                                             | CVD (79)    | 0.1/wk            | 1.00 (reference)   | Age, sex, educational level, residential area, monthly household income, alcohol drinking, smoking in pack-years, physical activity level, dietary supplement use, history of hypertension and                                                                                                |
|                                                       |                                                       |               |            |                                          |                                       |                                                                                                       |                                                                                                                                                                                                           |             | 0.7/wk            | 1.72 (0.81, 3.64)  |                                                                                                                                                                                                                                                                                               |
|                                                       |                                                       |               |            |                                          |                                       |                                                                                                       |                                                                                                                                                                                                           |             | 1.6/wk            | 3.70 (1.65, 8.30)  |                                                                                                                                                                                                                                                                                               |
|                                                       |                                                       |               |            |                                          |                                       |                                                                                                       |                                                                                                                                                                                                           |             | 4.2/wk            | 2.81 (1.25, 6.30)  |                                                                                                                                                                                                                                                                                               |

|                                  |                                                      |               |     |                                                             |         |                                                            |                                                                    |                         |                                                                          |                                                                                                                                                |                                                                                                                                                                                                                                                                                              |
|----------------------------------|------------------------------------------------------|---------------|-----|-------------------------------------------------------------|---------|------------------------------------------------------------|--------------------------------------------------------------------|-------------------------|--------------------------------------------------------------------------|------------------------------------------------------------------------------------------------------------------------------------------------|----------------------------------------------------------------------------------------------------------------------------------------------------------------------------------------------------------------------------------------------------------------------------------------------|
|                                  |                                                      |               |     |                                                             |         |                                                            |                                                                    |                         |                                                                          |                                                                                                                                                | dyslipidemia, and intakes of total energy, total vegetables, total fruits, red meat, fiber, vitamin E, and BMI                                                                                                                                                                               |
| Larsson et al. 2015              | Cohort of Swedish Men and Swedish Mammography Cohort | Sweden        | 13  | Number of men and women with type 2 diabetes not available. | 45-74 y | SFFQ, baseline only                                        | Confirmed by Swedish National Patient and Cause of Death Registers | CHD (612)               | 0-3/mo<br>1-2/wk<br>3-6/wk<br>≥1.15/d                                    | 1.00 (reference)<br>0.98 (0.80, 1.21)<br>0.92 (0.66, 1.28)<br>0.95 (0.57, 1.60)                                                                | Age, education, family history of MI before 60 y of age, smoking status and pack-years of smoking, aspirin use, walking/cycling, exercise, BMI, history of hypertension, hypercholesterolemia, and diabetes, and intakes of total energy, alcohol, fruits and vegetables, and processed meat |
|                                  |                                                      |               |     |                                                             |         |                                                            |                                                                    | Ischemic stroke (455)   | 0-3/mo<br>1-2/wk<br>3-6/wk<br>≥1.15/d                                    | 1.00 (reference)<br>1.03 (0.80, 1.33)<br>0.88 (0.60, 1.29)<br>0.83 (0.46, 1.48)                                                                |                                                                                                                                                                                                                                                                                              |
|                                  |                                                      |               |     |                                                             |         |                                                            |                                                                    | Hemorrhagic stroke (44) | 0-3/mo<br>1-2/wk<br>3-6/wk<br>≥1.15/d                                    | 1.00 (reference)<br>0.38 (0.11, 1.25)<br>1.63 (0.39, 6.74)<br>-                                                                                |                                                                                                                                                                                                                                                                                              |
| Qureshi et al. 2007              | NHANES-I                                             | United States | 20  | 349 men and women with type 2 diabetes                      | 25-74 y | Self-administered nutritional questionnaire, baseline only | Confirmed by medical records or death certificate                  | Stroke (57)             | <1/wk<br>1-6/wk<br>≥7/wk                                                 | 1.00 (reference)<br>1.10 (0.50, 2.50)<br>0.60 (0.20, 1.50)                                                                                     | Age, sex, race/ethnicity, systolic blood pressure, diabetes, serum cholesterol, smoking, BMI, education                                                                                                                                                                                      |
|                                  |                                                      |               |     |                                                             |         |                                                            |                                                                    | Ischemic stroke (51)    | <1/wk<br>1-6/wk<br>≥7/wk                                                 | 1.00 (reference)<br>1.10 (0.40, 2.10)<br>0.50 (0.20, 1.40)                                                                                     |                                                                                                                                                                                                                                                                                              |
|                                  |                                                      |               |     |                                                             |         |                                                            |                                                                    | CHD (132)               | <1/wk<br>1-6/wk<br>≥7/wk                                                 | 1.00 (reference)<br>1.20 (0.70, 2.30)<br>1.90 (1.00, 3.50)                                                                                     |                                                                                                                                                                                                                                                                                              |
| Scrafford et al 2011             | NHANES III                                           | United States | 8.8 | 743 men and women                                           | >17 y   | Self-administered questionnaire, FFQ baseline only         | Linking death records from National Death Index                    | CHD death (66)          | 0.22/wk<br>1.87/wk<br>7.21/wk                                            | 1.00 (reference)<br>0.63 (0.24, 1.64)<br>0.97 (0.40, 2.39)                                                                                     | Age, sex, and energy intake                                                                                                                                                                                                                                                                  |
|                                  |                                                      |               |     |                                                             |         |                                                            |                                                                    | Stroke death (24)       | 0.22/wk<br>1.87/wk<br>7.21/wk                                            | 1.00 (reference)<br>1.79 (0.93, 6.30)<br>0.32 (0.07, 1.42)                                                                                     |                                                                                                                                                                                                                                                                                              |
| Trichopoulos et al 2006          | EPIC-Greece                                          | Greece        | 4.5 | 1 013 men and women                                         |         | Interviewer-administered FFQ baseline only                 | Based on death certificate information.                            | CVD Death (46)          | Per 10g/d                                                                | 1.54 (1.20, 1.97)                                                                                                                              | Gender, age, educational level, smoking, waist-to-height, hip circumference, MET score, treatment with insulin, treatment for hypertension at enrolment, and treatment for hypercholesterolaemia at enrolment and other indicated food groups.                                               |
| Drouin-Chartier et al. (current) | NHS                                                  | United States | 32  | 10 936 women                                                | 30-55 y | Self-administered SFFQ, every 4 years                      | Self-report with or without validation with medical records        | CVD (1 725)             | <1/mo<br>1-<4/mo<br>1-<3/wk<br>3-<5/wk<br>5-<7/wk<br>≥1/d<br>Per 1 egg/d | 1.00 (reference)<br>0.84 (0.61, 1.16)<br>0.99 (0.73, 1.34)<br>1.06 (0.77, 1.45)<br>1.23 (0.85, 1.78)<br>1.26 (0.84, 1.88)<br>1.29 (1.08, 1.54) | Age, calendar time, smoking status, BMI, physical activity, postmenopausal hormone use, race, family history of myocardial infarction, baseline high blood cholesterol, baseline high blood pressure, alcohol intake, multivitamin use, daily intake of total calories, full-fat milk,       |

bacon, red meat, other processed meats, refined grains, fruits, vegetables, potatoes, coffee, fruit juices, and sugar-sweetened beverages

|        |               |    |             |         |                                       |                                                             |             |                                                                          |                                                                                                                                                |                                                                                                                                                                                                                                                                                                                                                                                                                                                          |
|--------|---------------|----|-------------|---------|---------------------------------------|-------------------------------------------------------------|-------------|--------------------------------------------------------------------------|------------------------------------------------------------------------------------------------------------------------------------------------|----------------------------------------------------------------------------------------------------------------------------------------------------------------------------------------------------------------------------------------------------------------------------------------------------------------------------------------------------------------------------------------------------------------------------------------------------------|
| NHS II | United States | 22 | 6 414 women | 25-44 y | Self-administered SFFQ, every 4 years | Self-report with or without validation with medical records | CVD (226)   | <1/mo<br>1-<4/mo<br>1-<3/wk<br>3-<5/wk<br>5-<7/wk<br>≥1/d<br>Per 1 egg/d | 1.00 (reference)<br>0.44 (0.26, 0.75)<br>0.44 (0.26, 0.74)<br>0.39 (0.21, 0.73)<br>0.66 (0.25, 1.73)<br>0.57 (0.17, 1.91)<br>1.02 (0.52, 2.00) | Age, calendar time, smoking status, BMI, physical activity, oral contraceptive use, postmenopausal hormone use, race, family history of myocardial infarction, baseline high blood cholesterol, baseline high blood pressure, alcohol intake, multivitamin use, daily intake of total calories, full-fat milk, bacon, red meat, other processed meats, refined grains, fruits, vegetables, potatoes, coffee, fruit juices, and sugar-sweetened beverages |
| HPFS   | United States | 26 | 4 670 men   | 40-75 y | Self-administered SFFQ, every 4 years | Self-report with or without validation with medical records | CVD (1 038) | <1/mo<br>1-<4/mo<br>1-<3/wk<br>3-<5/wk<br>5-<7/wk<br>≥1/d<br>Per 1 egg/d | 1.00 (reference)<br>1.06 (0.78, 1.45)<br>1.00 (0.74, 1.36)<br>0.99 (0.71, 1.37)<br>1.05 (0.68, 1.63)<br>1.05 (0.69, 1.61)<br>0.93 (0.75, 1.16) | Age, calendar time, smoking status, BMI, physical activity, family history of myocardial infarction, baseline high blood cholesterol, baseline high blood pressure, alcohol intake, multivitamin use, daily intake of total calories, full-fat milk, bacon, red meat, other processed meats, refined grains, fruits, vegetables, potatoes, coffee, fruit juices, and sugar-sweetened beverages                                                           |

\* Relative risk estimates were obtained from Cox proportional hazards regression models in all studies.

† CHD included coronary artery disease, myocardial infarction, ischemic heart disease; CVD included combined vascular events (CHD and stroke).

‡ The risk estimates from Houston et al. and Trichopoulou et al. among individuals with diabetes were included in the meta-analysis of studies among the general population as no estimate was available for the entire cohort.

BMI: body mass index; CHD: coronary heart disease; CVD: cardiovascular disease; FFQ: food frequency questionnaire; HDL-C: high-density lipoprotein cholesterol; HPFS: Health Professionals' Follow-up Study; LDL-C: low-density lipoprotein cholesterol; NHANES: National Health and Nutrition Examination Survey; NHS: Nurses' Health Study; SD: standard deviation; SFFQ: semiquantitative food frequency questionnaire; TG: triglyceride.



**Supplemental Table 11:** List of confounders among studies included in the meta-analysis.

|                                                                         | Abdollahi et al. 2019 | Diez-Espino et al. 2017* | Djousse et al. 2008 | Farvid et al. 2017 | Goldberg et al. 2014 | Guo et al. 2018 | Houston et al. 2011* | Jang et al. 2018* | Key et al. 2019 | Larsson et al. 2015*† | Mann et al. 1997 | Misirli et al. 2012 | Nakamura et al. 2004† | Nakamura et al. 2006 | Nakamura et al. 2018 | Qin et al. 2018 | Qureshi et al. 2007* | Sauvaget et al. 2003 | Scrafford et al. 2011† | Trichopoulos et al. 2006* | van den Brandt et al. 2019 | Virtanen et al. 2016 | Wang et al. 2016 | Xu et al. 2018 | Yaemsiri et al. 2012 | Zazpe et al. 2011 | Zhong et al. 2019 | Drouin-Chartier et al., current*† |    |   |
|-------------------------------------------------------------------------|-----------------------|--------------------------|---------------------|--------------------|----------------------|-----------------|----------------------|-------------------|-----------------|-----------------------|------------------|---------------------|-----------------------|----------------------|----------------------|-----------------|----------------------|----------------------|------------------------|---------------------------|----------------------------|----------------------|------------------|----------------|----------------------|-------------------|-------------------|-----------------------------------|----|---|
| <b>Primary confounders</b>                                              |                       |                          |                     |                    |                      |                 |                      |                   |                 |                       |                  |                     |                       |                      |                      |                 |                      |                      |                        |                           |                            |                      |                  |                |                      |                   |                   |                                   |    |   |
| Age                                                                     | X                     | X                        | X                   | X                  | X                    | X               | X                    | X                 | X               | X                     | X                | X                   | X                     | X                    | X                    | X               | X                    | X                    | X                      | X                         | X                          | X                    | X                | X              | X                    | X                 | X                 | X                                 | X  |   |
| Sex                                                                     | NA                    | X                        | NA                  | X                  | X                    | NA              | X                    | X                 | X               | NA                    | X                | X                   | NA                    | X                    | NA                   | X               | X                    | X                    | NA                     | X                         | X                          | NA                   | X                | X              | X                    | NA                | X                 | X                                 | NA |   |
| Body mass index                                                         | X                     | X                        | X                   | X                  | X                    | X               | X                    | X                 | X               | X                     |                  | X                   | X                     | X                    | X                    | X               | X                    | X                    |                        | X                         | X                          | X                    | X                | X              |                      | X                 | X                 | X                                 | X  |   |
| Smoking status                                                          | X                     | X                        | X                   | X                  | X                    | X               | X                    | X                 | X               | X                     | X                | X                   | X                     | X                    | X                    | X               | X                    | X                    |                        | X                         | X                          | X                    | X                | X              | X                    | X                 | X                 | X                                 | X  |   |
| Physical activity/energy expenditure                                    | X                     | X                        | X                   | X                  | X                    | X               | X                    | X                 | X               | X                     |                  | X                   |                       |                      |                      | X               |                      |                      |                        |                           | X                          | X                    |                  | X              | X                    | X                 | X                 | X                                 | X  |   |
| Alcohol intake                                                          | X                     | X                        | X                   | X                  | X                    | X               | X                    | X                 | X               | X                     |                  |                     | X                     | X                    | X                    | X               |                      | X                    | X                      | X                         | X                          | X                    | X                | X              | X                    | X                 | X                 | X                                 | X  | X |
| Total energy intake                                                     | X                     | X                        |                     | X                  | X                    | X               | X                    | X                 | X               | X                     |                  | X                   |                       |                      |                      |                 |                      |                      | X                      | X                         | X                          | X                    |                  |                |                      | X                 | X                 | X                                 | X  |   |
| <b>Secondary confounders</b>                                            |                       |                          |                     |                    |                      |                 |                      |                   |                 |                       |                  |                     |                       |                      |                      |                 |                      |                      |                        |                           |                            |                      |                  |                |                      |                   |                   |                                   |    |   |
| Hypertension and/or blood pressure and/or blood pressure-lowering drugs | X                     | X                        | X                   | X                  | X                    |                 | X                    | X                 | X               | X                     |                  | X                   | X                     | X                    | X                    | X               | X                    | X                    | X                      | X                         | X                          | X                    |                  |                | X                    | X                 | X                 | X                                 | X  | X |
| Dyslipidemia and/or lipid profile and/or lipid-lowering drugs           |                       | X                        | X                   |                    | X                    |                 | X                    | X                 | X               | X                     |                  |                     | X                     | X                    | X                    |                 | X                    |                      |                        |                           | X                          |                      |                  |                | X                    | X                 |                   | X                                 | X  |   |
| Red and/or processed meat intake                                        |                       |                          |                     |                    |                      | X               |                      | X                 | X               | X                     |                  |                     |                       | X                    | X                    |                 |                      |                      |                        |                           | X                          |                      |                  |                |                      |                   |                   |                                   | X  | X |
| Mediterranean food pattern (including red and/or processed meat)        |                       | X                        |                     |                    | X                    |                 |                      |                   |                 |                       |                  |                     |                       |                      |                      |                 |                      |                      |                        |                           |                            |                      |                  |                |                      |                   |                   |                                   |    |   |
| Dietary pattern (including red and/or processed meat)                   |                       |                          |                     |                    |                      |                 |                      |                   |                 |                       |                  |                     |                       |                      |                      | X               |                      |                      |                        |                           |                            |                      |                  |                |                      |                   |                   |                                   |    |   |
| <b>Other confounders</b>                                                |                       |                          |                     |                    |                      |                 |                      |                   |                 |                       |                  |                     |                       |                      |                      |                 |                      |                      |                        |                           |                            |                      |                  |                |                      |                   |                   |                                   |    |   |
| Intakes of:                                                             |                       |                          |                     |                    |                      |                 |                      |                   |                 |                       |                  |                     |                       |                      |                      |                 |                      |                      |                        |                           |                            |                      |                  |                |                      |                   |                   |                                   |    |   |
| Refined grains/white bread                                              |                       |                          |                     |                    |                      |                 |                      |                   |                 |                       |                  |                     |                       |                      |                      |                 |                      |                      |                        |                           |                            |                      |                  |                |                      |                   |                   |                                   |    | X |
| Coffee                                                                  |                       |                          |                     |                    |                      |                 |                      |                   |                 |                       |                  |                     |                       |                      |                      |                 |                      |                      |                        |                           | X                          |                      |                  |                |                      |                   |                   |                                   |    | X |





**Supplemental Table 12:** Assessment of risk of bias with the Newcastle-Ottawa Scale.\*

| Author, year (Study ID)          | Selection                                 |                                     |                           |                                                       | Comparability                   |                                   | Outcome               |                       |                       | Total |
|----------------------------------|-------------------------------------------|-------------------------------------|---------------------------|-------------------------------------------------------|---------------------------------|-----------------------------------|-----------------------|-----------------------|-----------------------|-------|
|                                  | Representativeness of the exposed cohort* | Selection of the non-exposed cohort | Ascertainment of exposure | Outcome of interest not present at start of the study | Control for primary confounders | Control for secondary confounders | Assessment of outcome | Duration of follow-up | Adequacy of follow-up |       |
| Abdollahi et al. 2019            | 1                                         | 1                                   | 0                         | 1                                                     | 1                               | 0                                 | 1                     | 1                     | 1                     | 7     |
| Díez-Espino et al. 2017†         | 0                                         | 1                                   | 1                         | 1                                                     | 1                               | 1                                 | 1                     | 0                     | 1                     | 7     |
| Djousse et al. 2008              | 0                                         | 1                                   | 1                         | 1                                                     | 0                               | 0                                 | 1                     | 1                     | 1                     | 6     |
| Farvid et al. 2017               | 1                                         | 1                                   | 0                         | 1                                                     | 1                               | 0                                 | 0                     | 1                     | 1                     | 6     |
| Goldberg et al. 2014             | 1                                         | 1                                   | 0                         | 1                                                     | 1                               | 1                                 | 1                     | 1                     | 1                     | 8     |
| Guo et al. 2018                  | 1                                         | 1                                   | 1                         | 1                                                     | 1                               | 0                                 | 1                     | 1                     | 1                     | 8     |
| Houston et al. 2011†             | 1                                         | 1                                   | 0                         | 1                                                     | 1                               | 0                                 | 1                     | 0                     | 1                     | 6     |
| Jang et al. 2018*                | 1                                         | 1                                   | 1                         | 1                                                     | 1                               | 1                                 | 1                     | 0                     | 0                     | 7     |
| Key et al. 2019                  | 1                                         | 1                                   | 0                         | 1                                                     | 1                               | 1                                 | 1                     | 1                     | 1                     | 8     |
| Larsson et al. 2015†‡            | 1                                         | 1                                   | 0                         | 1                                                     | 1                               | 1                                 | 1                     | 1                     | 1                     | 8     |
| Mann et al. 1997                 | 0                                         | 1                                   | 0                         | 1                                                     | 0                               | 0                                 | 1                     | 1                     | 1                     | 5     |
| Misirli et al. 2012              | 0                                         | 1                                   | 0                         | 1                                                     | 0                               | 0                                 | 1                     | 1                     | 1                     | 5     |
| Nakamura et al. 2004‡            | 1                                         | 1                                   | 0                         | 1                                                     | 0                               | 0                                 | 1                     | 1                     | 1                     | 6     |
| Nakamura et al. 2006             | 1                                         | 1                                   | 0                         | 1                                                     | 0                               | 1                                 | 1                     | 1                     | 1                     | 7     |
| Nakamura et al. 2018             | 1                                         | 1                                   | 0                         | 1                                                     | 0                               | 1                                 | 1                     | 1                     | 1                     | 7     |
| Qin et al. 2018                  | 1                                         | 1                                   | 1                         | 1                                                     | 0                               | 0                                 | 1                     | 0                     | 1                     | 6     |
| Qureshi et al. 2007†             | 1                                         | 1                                   | 0                         | 1                                                     | 0                               | 0                                 | 1                     | 1                     | 1                     | 6     |
| Sauvaget et al. 2003             | 1                                         | 1                                   | 0                         | 1                                                     | 0                               | 0                                 | 1                     | 1                     | 1                     | 6     |
| Scrafford et al. 2011‡           | 1                                         | 1                                   | 0                         | 1                                                     | 0                               | 0                                 | 1                     | 0                     | 1                     | 5     |
| Trichopoulou et al 2006†         | 1                                         | 1                                   | 0                         | 1                                                     | 0                               | 1                                 | 1                     | 0                     | 1                     | 6     |
| van den Brandt et al. 2019       | 1                                         | 1                                   | 0                         | 1                                                     | 1                               | 0                                 | 1                     | 1                     | 1                     | 7     |
| Virtanen et al. 2016             | 1                                         | 1                                   | 0                         | 1                                                     | 1                               | 0                                 | 1                     | 1                     | 1                     | 7     |
| Wang et al. 2016                 | 0                                         | 1                                   | 0                         | 1                                                     | 0                               | 0                                 | 1                     | 1                     | 1                     | 5     |
| Xu et al. 2018                   | 1                                         | 1                                   | 0                         | 1                                                     | 0                               | 0                                 | 1                     | 0                     | 1                     | 5     |
| Yaemsiri et al. 2012             | 0                                         | 1                                   | 1                         | 1                                                     | 1                               | 0                                 | 1                     | 0                     | 1                     | 6     |
| Zazpe et al. 2011                | 0                                         | 1                                   | 0                         | 1                                                     | 1                               | 0                                 | 1                     | 0                     | 1                     | 5     |
| Zhong et al. 2019                | 1                                         | 1                                   | 0                         | 1                                                     | 1                               | 0                                 | 1                     | 1                     | ?                     | 6     |
| Drouin-Chartier et al. current†‡ | 0                                         | 1                                   | 1                         | 1                                                     | 1                               | 1                                 | 1                     | 1                     | 1                     | 8     |

\* Representativeness of the exposed cohort: 1 point awarded if community-based population; Selection of the non-exposed cohort: 1 point awarded if drawn from the same community as the exposed cohort; Ascertainment of exposure: 1 point awarded if diet assessed at baseline and at least one time during follow-up; Outcome of interest not present at start of the study: 1 point awarded if individuals with prevalent CVD at baseline were excluded; Control for primary confounders: 1 point awarded if adjustment for age, sex, BMI, smoking status, alcohol intake, and physical activity; Control for secondary confounders: 1 point awarded if adjustment for hypertension and/or blood pressure and/or blood pressure-lowering drugs, and dyslipidemia and/or lipid profiles and/or lipid-lowering drugs, and total energy intake, and at least one dietary confounders that included red and/or processed meat intake (e.g. adjustment for red and/or processed meat intake or adjustment for dietary pattern that included meat); Assessment of outcome: 1 point awarded if non-fatal cases were confirmed by physician’s diagnosis, and fatal cases confirmed by death certificates; Duration of follow-up; 1 point awarded if follow-up ≥ 10 years; Adequacy of follow-up: 1 point awarded if loss to follow-up <20%.

† Study includes risk estimates for individuals with type 2 diabetes; ‡ Study includes risk estimates for men and women separately.

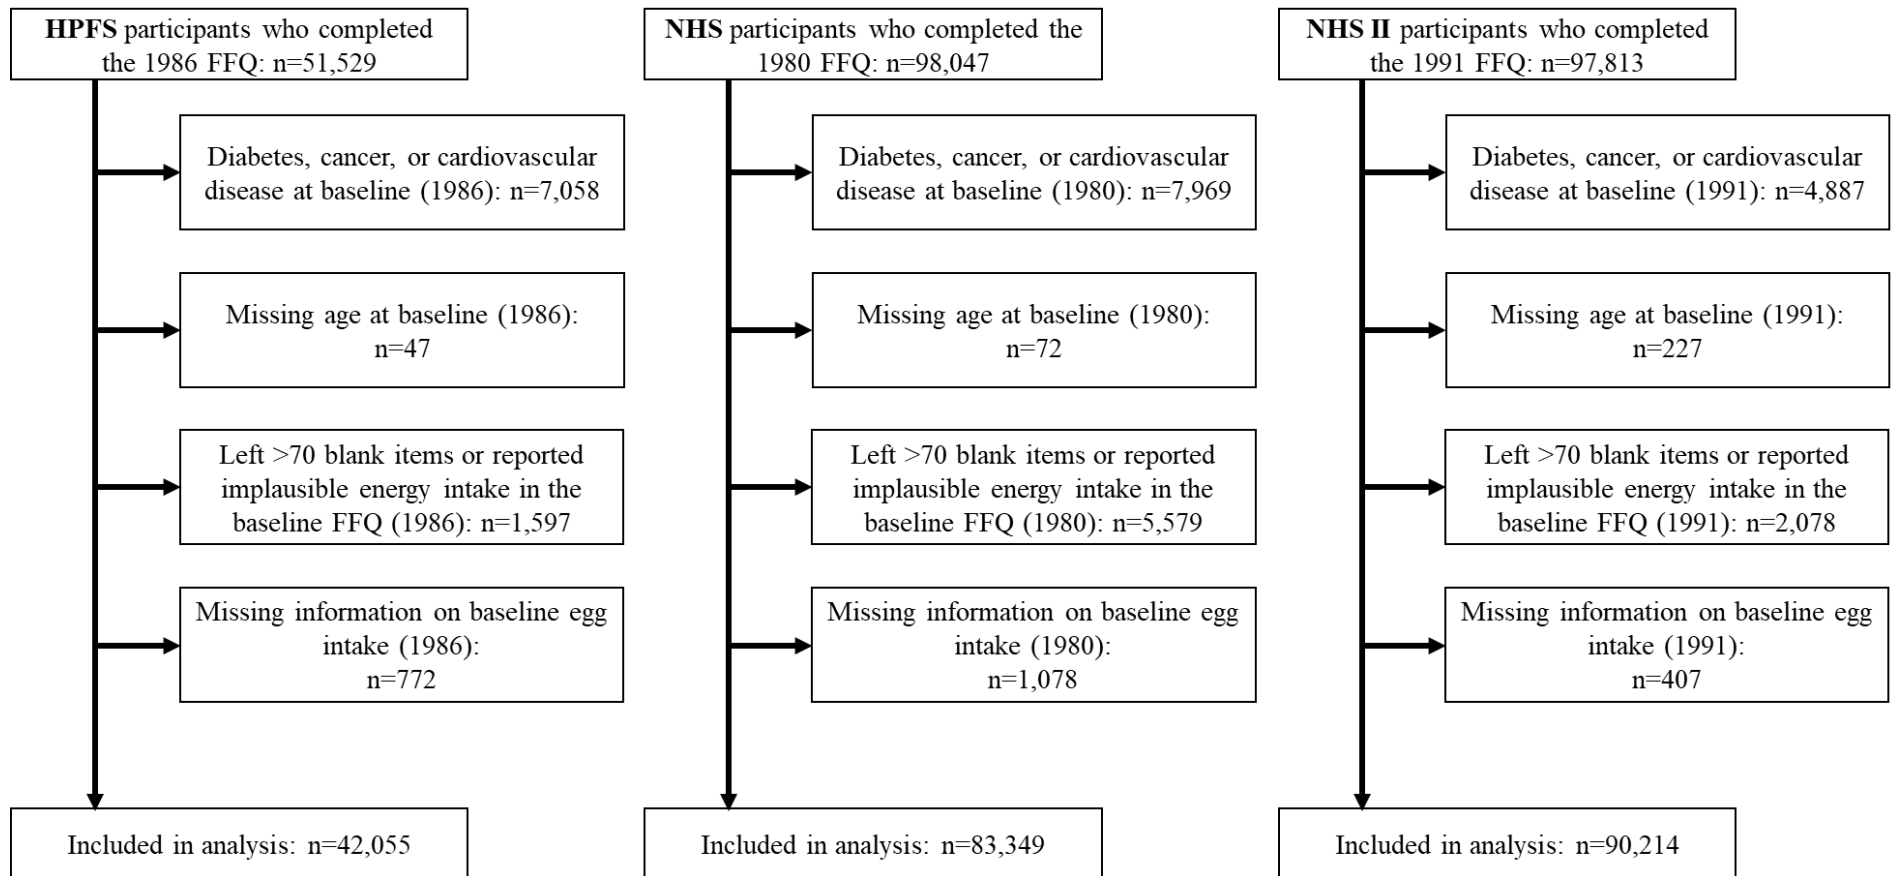

**Supplemental Figure 1:** Flow chart of participants.

FFQ: Food frequency questionnaire; HPFS: Health Professionals' Follow-up Study; NHS: Nurses' Health Study.

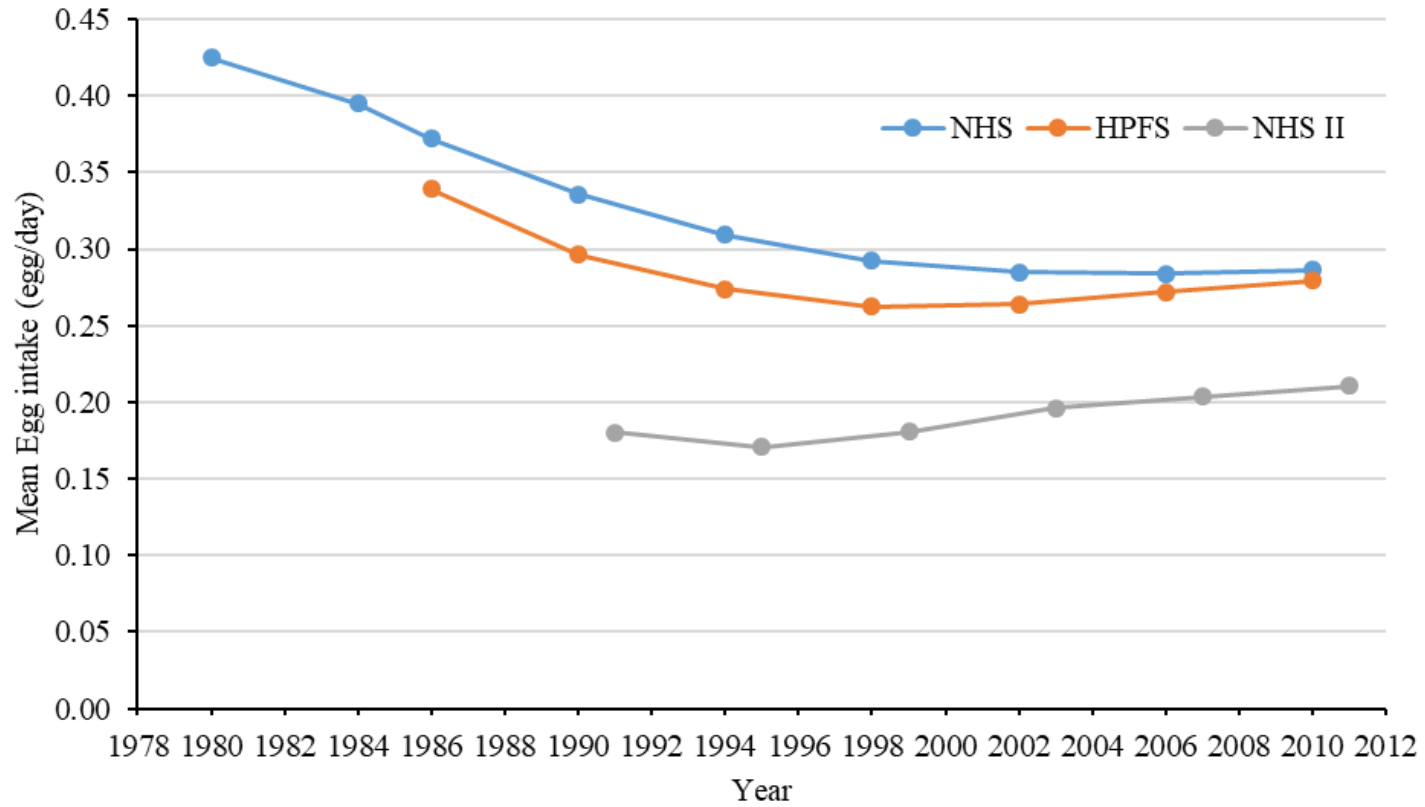

**Supplemental Figure 2:** Trends in mean egg consumption in the Nurses’ Health Study, Nurses’ Health Study II, and Health Professionals Follow-Up Study over time.

Mean egg intake calculated for each questionnaire returned.

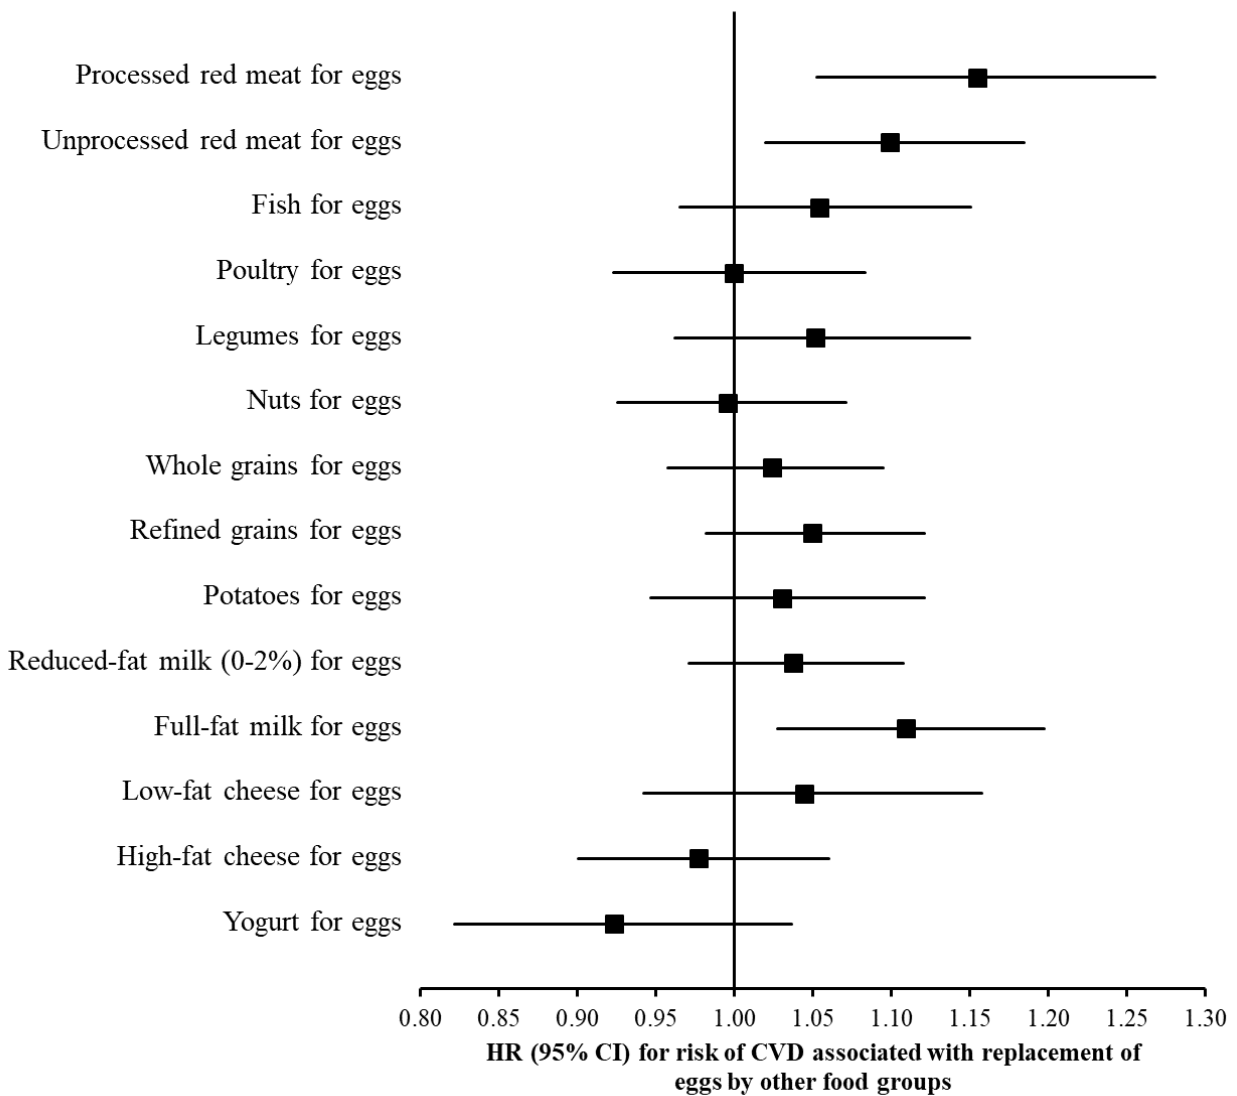

**Supplemental Figure 3:** Statistical model-based hazard ratios and 95% confidence intervals for incident cardiovascular disease associated with replacement of one egg per day with one serving per day of other foods.

Substitution analyses were stratified by calendar time (in 2-year intervals) and cohort, and adjusted for age (months), race (Caucasian, other), family history of myocardial infarction (yes, no), baseline hypercholesterolemia (yes, no), baseline hypertension (yes, no), smoking status (never, former, current), body mass index ( $\text{kg/m}^2$ : categorical <21.0, 21.0-22.9, 23.0-24.9, 25.0-26.9, 27.0-29.9, 30.0-34.9,  $\geq 35.0$ ), physical activity (metabolic equivalent of task-hours/week: categorical <3.0, 3.0-8.9, 9.0-17.9, 18.0-26.9,  $\geq 27.0$ ), oral contraceptive use (never, former, current, in NHS II only), postmenopausal hormone use (premenopausal, never, former, current, in NHS and NHS II), alcohol intake (g/d in quintiles), and multivitamin use (yes, no). Model also included updated cumulative average of daily intake of total calories (kcal/d in quintiles), full-fat milk (servings/d in categories), bacon (servings/d in categories), unprocessed red meat (servings/d in categories), other processed meats (servings/d in categories), refined grains (servings/d in categories), fruits (servings/d in categories), vegetables (servings/d in categories), potatoes (servings/d in categories), coffee (servings/d in categories), fruit juices (servings/d in categories), and sugar-sweetened beverages (servings/d in categories). All covariates (except race, family history of myocardial infarction, baseline hypercholesterolemia and hypertension) were updated every 2 years.

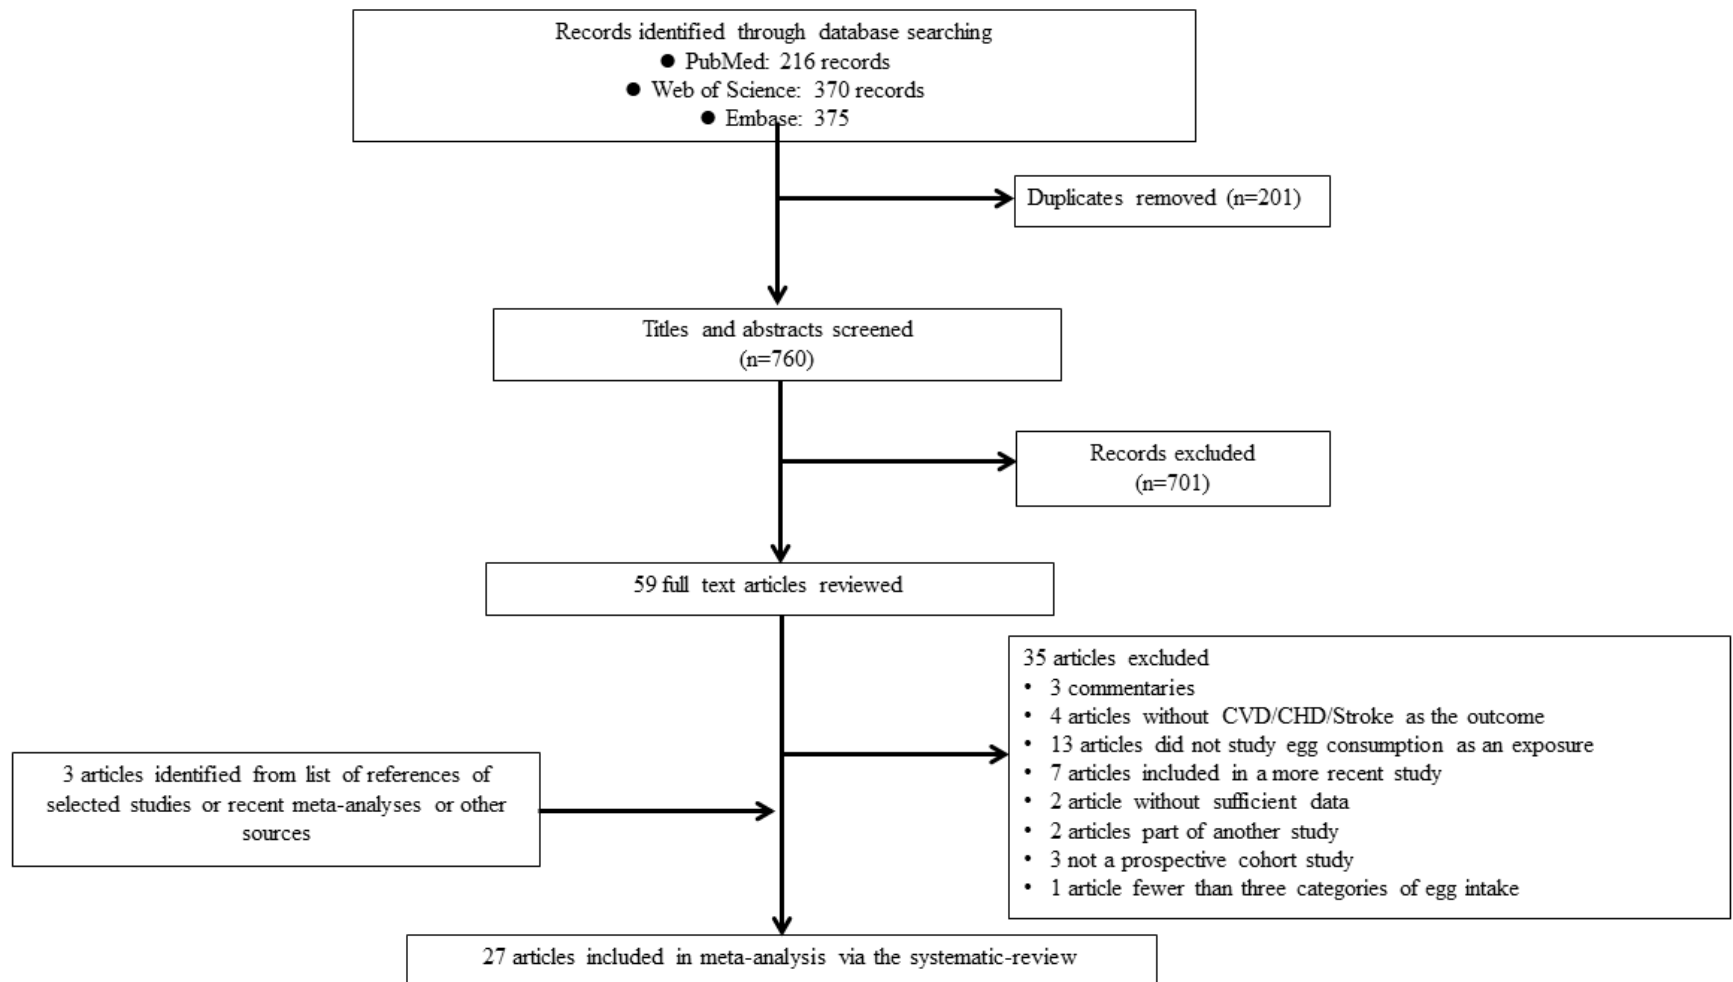

**Supplemental Figure 4:** Flow chart of study selection.



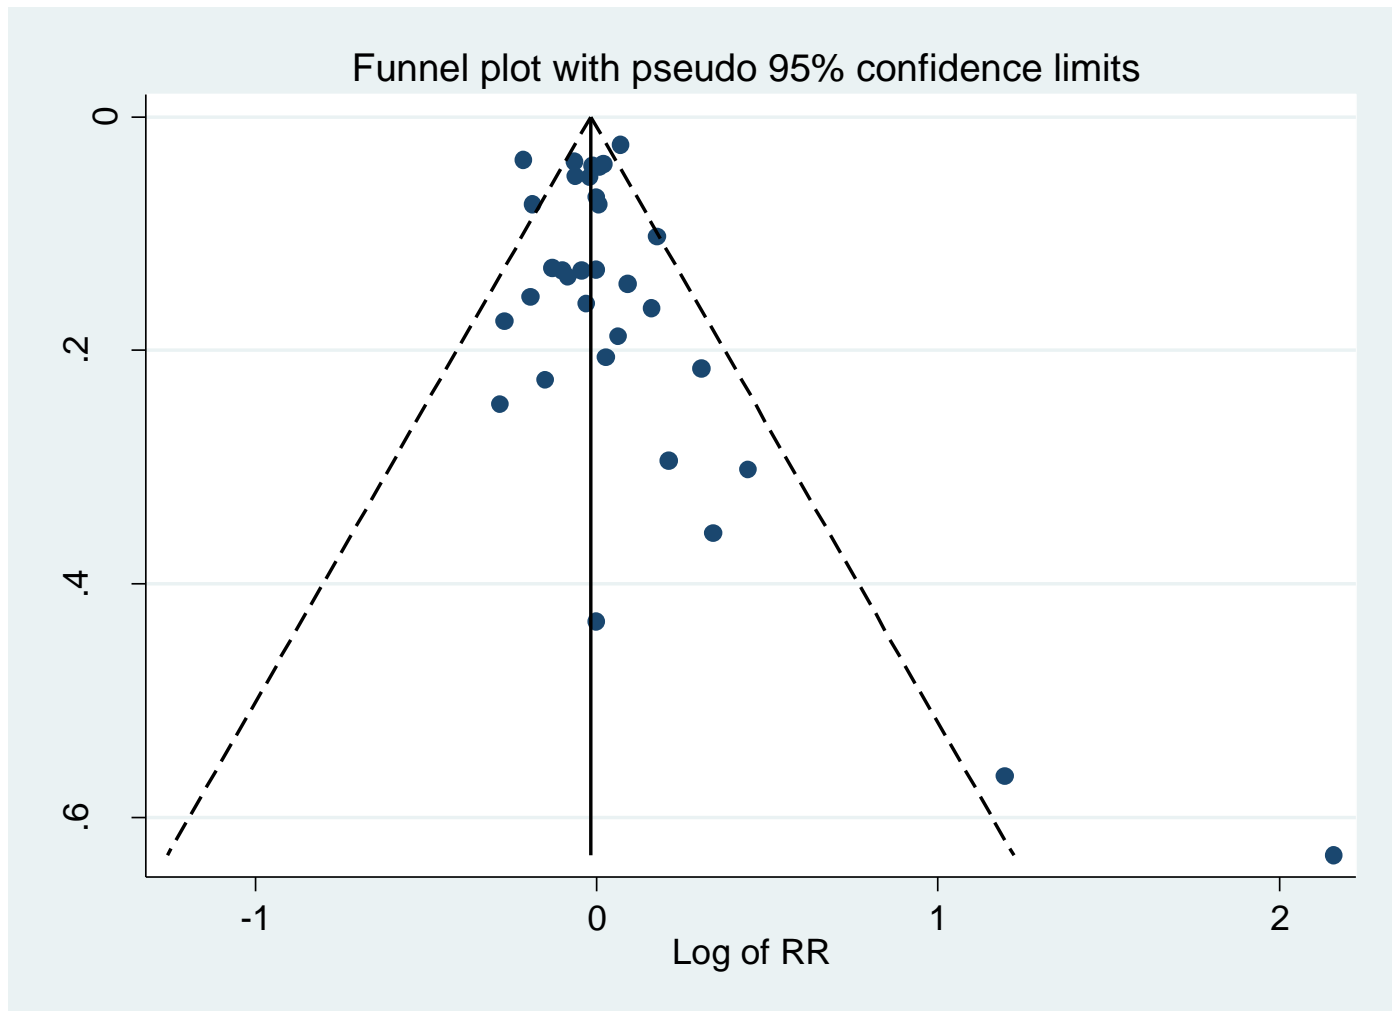

**Supplemental Figure 5:** Funnel plot for assessment of publication bias for the association between egg consumption and risk of cardiovascular disease.

*P* value for Egger's test = 0.44; *P* value for Begg's test = 0.08.

CVD: cardiovascular disease; RR: relative risk.

Meta-analysis random-effects estimates (exponential form)  
Study omitted

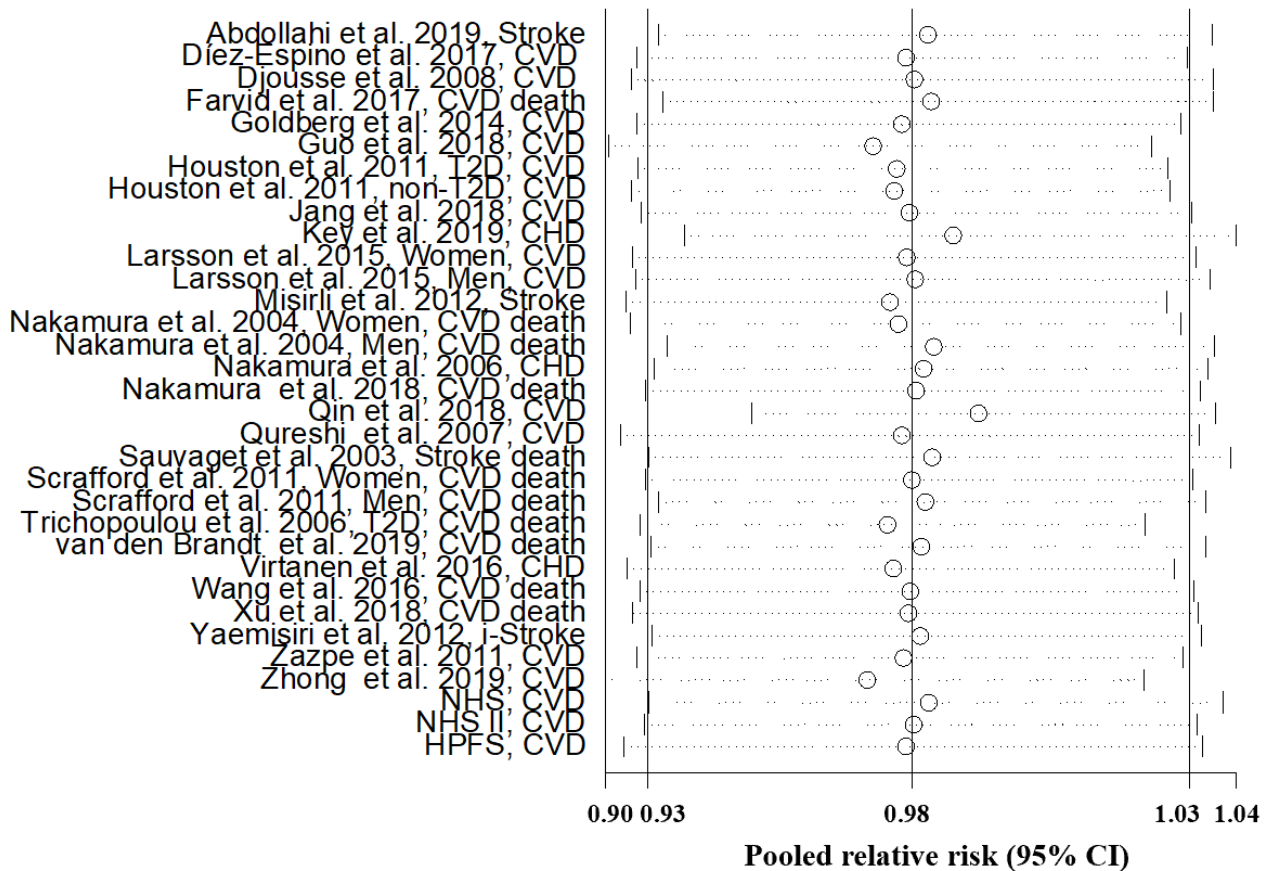

**Supplemental Figure 6:** Forest plot of influence analysis for the association between egg consumption and risk of cardiovascular disease.

Each dot represents the pooled RR (95% CI) following the exclusion of the study listed on the left using random-effects meta-analysis. CVD: cardiovascular disease; CHD: coronary heart disease; H-stroke: hemorrhagic stroke; I-stroke: ischemic stroke; NHS: Nurses' Health Study; HPFS: Health Professionals Follow-Up Study.
